## 1 **From Cohorts to Molecules: Adverse Impacts of Endocrine Disrupting Mixtures**

2 Lina Birgersson<sup>1,\*</sup>, Gábor Borbély<sup>2,\*</sup>, Nicolò Caporale<sup>3,4,\*</sup>, Pierre-Luc Germain<sup>3,5,\*</sup>, Michelle  
3 Leemans<sup>6,\*</sup>, Filip Rendel<sup>7</sup>, Giuseppe Alessandro D'Agostino<sup>3,4,8</sup>, Raul Bardini Bressan<sup>9</sup>,  
4 Francesca Cavallo<sup>3,4</sup>, Nadav Even Chorev<sup>3</sup>, Vesna Munic Kos<sup>2</sup>, Maddalena Lazzarin<sup>3</sup>, Steven  
5 M Pollard<sup>9</sup>, Birgitta Sundström<sup>7</sup>, Alejandro Lopez Tobon<sup>3,4</sup>, Sebastiano Trattaro<sup>3,4</sup>, Matteo  
6 Zanella<sup>3,4</sup>, Åke Bergman<sup>2</sup>, Pauliina Damdimopoulou<sup>2</sup>, Maria Jönsson<sup>10</sup>, Wieland Kiess<sup>11</sup>,  
7 Efthymia Kitraki<sup>12</sup>, Hannu Kiviranta<sup>13</sup>, Mattias Öberg<sup>2</sup>, Panu Rantakkoko<sup>13</sup>, Christina Rudén<sup>14</sup>,  
8 Olle Söder<sup>2</sup>, Carl-Gustaf Bornehag<sup>7,15,#</sup>, Barbara Demeneix<sup>6,#</sup>, Jean-Baptiste Fini<sup>6,#</sup>, Chris  
9 Gennings<sup>15,#</sup>, Eewa Nånberg<sup>7,#</sup>, Joëlle Rüegg<sup>2,16,#</sup>, Joachim Sturve<sup>1,#</sup> and Giuseppe Testa<sup>3,4,#</sup>

- 10
- 11 1. Department of Biological and Environmental Sciences. University of Gothenburg, Gothenburg,  
12 Sweden.
  - 13 2. Unit for Toxicology Sciences, Swetox, Karolinska Institutet, Södertälje, Sweden.
  - 14 3. Department of Experimental Oncology, Laboratory of Stem Cell Epigenetics, European Institute of  
15 Oncology, Milan, Italy
  - 16 4. Department of Oncology and Hemato-Oncology, University of Milan, Milan, Italy
  - 17 5. Current address: Brain Research Institute, University of Zürich, Zürich, Switzerland
  - 18 6. UMR 7221, Evolution of Endocrine Regulations. CNRS/ Muséum National d'Histoire Naturelle,  
19 Sorbonnes Universités, Paris, France
  - 20 7. Faculty of Health, Science and Technology, Department of Health Sciences, Karlstad University, SE-  
21 651 88 Karlstad, Sweden
  - 22 8. Current address: Duke-National University of Singapore, Singapore
  - 23 9. Centre for Regenerative Medicine and Edinburgh Cancer Research Centre, University of Edinburgh,  
24 Scotland
  - 25 10. Department of Organismal Biology, Uppsala University, Uppsala, Sweden
  - 26 11. Hospital for Children and Adolescents. Department of Women and Child Health. University Hospital.  
27 University of Leipzig, Germany

28 12. School of Health Sciences, National and Kapodistrian University of Athens, Athens, Greece

29 13. National Institute for Health and Welfare. Kuopio, Finland

30 14. Department of Applied Environmental Science, Stockholm University, Stockholm, Sweden

31 15. Icahn School of Medicine at Mount Sinai, New York, USA.

32 16. Department of Clinical Neuroscience, Karolinska Institutet, Stockholm, Sweden.

33

34 \*L.B., G.B., N.C., P-L.G., M.L. are equal co-first authors and are listed in alphabetical order

35

36 #C.G.B., B.D., J.B.F., C.G., E.N., J.R., J.S. and G.T. are equal senior authors and are listed in

37 alphabetical order

38

39 **Abstract**

40 Convergent evidence associates endocrine disrupting chemicals (EDCs) with major,  
41 increasingly-prevalent human disorders. Regulation requires elucidation of EDC-  
42 triggered molecular events causally linked to adverse health outcomes, but two factors  
43 limit their identification. First, experiments frequently use individual chemicals, whereas  
44 real life entails simultaneous exposure to multiple EDCs. Second, population-based and  
45 experimental studies are seldom integrated. This drawback was exacerbated until  
46 recently by lack of physiopathologically meaningful human experimental systems that  
47 link epidemiological data with results from model organisms.

48 We developed a novel approach, integrating epidemiological with experimental  
49 evidence. Starting from 1,874 mother-child pairs we identified mixtures of chemicals,  
50 measured during early pregnancy, associated with language delay or low-birth weight in  
51 offspring. These mixtures were then tested on multiple complementary *in vitro* and *in*  
52 *vivo* models. We demonstrate that each EDC mixture, at levels found in pregnant  
53 women, disrupts hormone-regulated and disease-relevant gene regulatory networks at  
54 both the cellular and organismal scale.

55

56

## 57 **Introduction**

58 Human populations are exposed to a large number of chemicals with endocrine  
59 disrupting properties (EDCs)<sup>1</sup>. Their regulation represents a major unmet challenge due  
60 to the fact that while exposure to single EDCs has repeatedly been associated with  
61 major disorders and impaired development<sup>2</sup>, real life entails simultaneous exposure to  
62 multiple EDCs in mixtures, with additive effects at lower doses than experimental effect  
63 thresholds for single compounds<sup>3</sup>. Experimental evidence with mixtures is however most  
64 often limited to combinations within the same chemical class or to observational  
65 measurements on more complex mixtures, thus lacking causative weight to link actual  
66 population-based exposure with adverse health outcomes in humans. Here we pursued  
67 a systematic integration of epidemiological and experimental evidence to elucidate the  
68 molecular pathways affected by EDC mixtures that are causally related to adverse  
69 outcomes in humans.

## 70 **Results**

71 *An integrated epidemiological-experimental design assessing the impact of EDC*  
72 *mixtures on human health and development*

73 To assess health outcomes of real-life EDC exposures we harnessed: i) the power of a  
74 population-based mother-child pregnancy cohort to measure prenatal EDC exposures,  
75 combined with novel biostatistical tools to infer associations between specific EDC  
76 mixtures and two child health domains: neurodevelopment and metabolism/growth  
77 (Figure 1a); ii) complementary assays in human systems, to establish causality and  
78 deconvolute gene regulatory networks and *in vitro* cellular responses dysregulated by

79 these EDC mixtures in concentrations corresponding to human exposure (Figure 1b); iii)  
80 paradigmatic *in vivo* models to determine the physiological impact of key affected  
81 pathways (Figure 1c).

82 *Definition and establishment of EDC-mixtures impacting human neurodevelopment and*  
83 *metabolism*

84 Humans are exposed to several classes of EDCs including phthalates, phenols and  
85 perfluorinated alkyl acids (PFAAs)<sup>1,2</sup>. We focused on prenatal exposures to mixtures of  
86 15 endocrine disruptive parent compounds (comprising 20 analytes/metabolites known  
87 or suspected of being endocrine disruptors<sup>2</sup> from these classes, to determine their  
88 potential associations with two major child health outcomes: neurodevelopment,  
89 measured as language delay at 30 months of age which is an early marker of cognitive  
90 development<sup>4</sup>, and metabolism/growth, measured as birth weight where low birth weight  
91 is associated with metabolic syndrome including obesity and glucose intolerance<sup>5</sup>. First  
92 we established exposure using biomonitoring data from the Swedish Environmental  
93 Longitudinal, Mother and child, Asthma and allergy (SELMA)<sup>6</sup> pregnancy cohort that  
94 includes 1,874 pregnant women (Table 1a), assessed for their urinary or serum EDC  
95 levels around the 10<sup>th</sup> week of gestation (Table 1b). Specifically, we profiled urine levels  
96 of 10 metabolites of 5 phthalates, bisphenol A (BPA) and triclosan (TCS), as well as  
97 serum levels of 8 perfluorinated alkyl acids (PFAAs).

98 Specific mixtures (in terms of both composition and dose) were associated with the two  
99 health outcomes in a three-step procedure (Figure 1a). First, we identified the prenatal  
100 exposure to EDCs, hereafter “bad actors”, that was associated with lower birth weight or  
101 language delay in children by using weighted quantile sum (WQS) regression<sup>7</sup>. Next, we

102 estimated the equivalent daily intake (DI) of “bad actors” measured in the urine (i.e.,  
103 phthalates and alkyl phenols), and estimated serum concentrations from the DI for these  
104 urinary measurement-based compounds. Finally, we used the geometric means, on a  
105 molar basis, for either the measured or estimated serum levels of all compounds and  
106 established mixing proportions to prepare, for experimental validation, the two mixtures  
107 associated to language delay (MIX N) and lower birth weight (MIX G) (Figure 1a;  
108 Extended data Table 1). Mixtures were tested across concentrations (0.01X, 0.1X, 1X,  
109 10X, 100X, 1000X) corresponding to human exposure (Table 1b), where X denotes the  
110 geometric mean of exposure levels in SELMA pregnant women.

#### 111 *MIX N disrupts human neurodevelopmental pathways*

112 To define the molecular impact of MIX N, we employed primary neural stem cells  
113 sourced from cortex and ganglionic eminence of human foetuses at post-conception  
114 week (PCW) 11 and 8, respectively (Figure 2a) (henceforth Human Foetal Primary  
115 Neural Stem Cells (HFPNSC)). Given the potentially non-linear and non-monotonic  
116 dose-response patterns associated with EDC mixtures<sup>8,9</sup>, the experimental design  
117 included 5 doses of MIX N, ranging from 0.1X to 1000X and a global assessment of  
118 impact on gene expression. To this end, RNA-seq was performed after 48h MIX N  
119 exposure and patterns of EDC dose-dependent transcriptional responses determined  
120 using an analysis that considers MIX N dilutions (including the DMSO control) as distinct  
121 categories. This unbiased approach, which does not assume any particular response  
122 pattern (e.g., linearity or monotony), allowed us to define lists of differentially-expressed  
123 genes (DEGs), henceforth “unbiased DEGs”, which were subsequently clustered on the  
124 basis of their dose-response patterns (Figure 2b). Next, we used the dose-response

125 patterns to re-interrogate the transcriptomes by regressing each gene to each pattern,  
126 permitting identification of larger sets of high confidence DEGs following each pattern  
127 (Extended data Figure 1a). The dose-response patterns showed dysregulation already  
128 at low concentrations, highlighting the significance of doses recapitulating human  
129 exposure.

130 Functional characterization of DEGs revealed enrichment in Gene Ontology (GO)  
131 categories related to chromatin modulation and regulation of gene expression (Figure  
132 2c), showing a major and specific impact of EDC during early forebrain development.  
133 Given our epidemiological evidence associating MIX N exposure to language delay, and  
134 the central role of chromatin dysfunction in autism and intellectual disabilities<sup>10</sup> we tested  
135 whether EDC-induced DEGs were enriched for genes associated with these conditions.  
136 We found significant enrichment for genes associated with Intellectual Disabilities ( $p \approx$   
137  $4.7 \times 10^{-14}$  ID<sup>11</sup>, Developmental Disorders ( $p \approx 1.5 \times 10^{-6}$  DDD<sup>12</sup>) and Autism Spectrum  
138 Disorders (ASD) ( $p \approx 5.1 \times 10^{-5}$  in the Autism Speaks-Google MSSNG database<sup>13</sup> and  $p \approx$   
139  $2.7 \times 10^{-4}$  in the Autism Spectrum/Intellectual Disability (ASID) database<sup>14</sup>) (Figure 2d).

140 While primary neural stem cells directly sourced from fetal telencephali represent the  
141 arguably most proximal model of human neurodevelopment, their availability is limited  
142 and hence they are ill suited for large-scale and iterative studies required to advance  
143 regulatory toxicology. We thus validated our transcriptomic findings on MIX N using two  
144 complementary neurodevelopmental models based on self-renewing sources of human  
145 induced pluripotent stem cells (iPSC): i) neuronal precursors differentiated from iPSC  
146 through short-term (7 days) Ngn2 over-expression<sup>15</sup> and ii) apical progenitors (sourced  
147 at day 18 of culture) from iPSC-derived 3D cortical organoids that recapitulate human *in*

148 *vivo* corticogenesis<sup>16</sup>. We confirmed in Ngn2-driven neuronal precursors the early  
149 activation of Nestin, PAX6 and SLC17A7 (VGLUT1) along with other defining neural  
150 markers (Extended data Figure 1b). Likewise, day 18 organoids upregulated neural  
151 progenitor genes (Extended data Figure 1b). Immunofluorescence confirmed expression  
152 of specific markers, including PAX6 and Nestin (Figure 2e), as well as, in organoids, the  
153 defining arrangement in ventricular zone-like structures lined by ZO-1 expressing cells  
154 (Figure 2f and Extended data Figure 1c).

155 Principal component analysis of the transcriptomes confirmed that organoids and Ngn2-  
156 driven precursors map closer to cortical than ganglionic eminence HFPNSC, confirming  
157 their dorsal fate (Extended data Figure 1d). In addition, organoids appeared more  
158 homogenous than Ngn2-driven lines. To assess the extent to which these systems  
159 recapitulate the effects seen in HFPNSC, we subjected them to the same exposures  
160 and profiled by RNA-seq the dose-response of the two clusters of DEGs identified  
161 above. Importantly, while we observed for both systems a highly significant overlap  
162 ( $p \sim 3e-8$  to  $5e-12$ ) with dysregulated genes in HFPNSC (Figure 2g), only organoids  
163 largely recapitulated the dose-response patterns seen for DEGs in HFPNSC (compare  
164 Figure 2i with 2b), thus representing a potentially transforming tool for large-scale  
165 regulatory toxicology.

166 Our validation of human iPSC-based neurodevelopmental models for assessing EDCs  
167 paves the way to the systematic evaluation of their toxicity across different human  
168 genetic backgrounds using representative iPSC collections from defined populations, for  
169 which we empirically derived the optimal transcriptome-based disease modeling  
170 designs<sup>17</sup>. Since MIX N was defined by verbal proficiency we thus reasoned that a



171 genetic background conferring relative resilience of verbal skills would provide a  
172 rigorous proof of principle of the applicability of our findings across genetic backgrounds.  
173 To this end, we derived Ngn2-driven precursors and cortical organoids from iPSC lines  
174 harboring the 7q11.23 hemi-deletion that causes Williams-Beuren syndrome (WBS), a  
175 neurodevelopmental disorder characterized by cognitive weaknesses that selectively  
176 spare language abilities, and for which we previously uncovered disease-relevant  
177 dysregulation in iPSC and neural progenitors<sup>18</sup>. Using the same analytical approach  
178 outlined above (Figure 2j-k), we confirmed that even in this language-resilient genetic  
179 background, MIX N yields non-monotonic dose-responses with dysregulation of gene  
180 expression at low concentrations. In both experimental models, this dysregulation  
181 resulted in a significant enrichment of the DEGs for categories relevant for  
182 neurodevelopment, such as axonogenesis and synaptic signaling (Figure 2l-m).  
183 Interestingly, however, neither WBS organoids nor Ngn2-driven lines recapitulated the  
184 patterns of dose-response previously identified for the two clusters of DEGs from  
185 HFPNSC, which were recapitulated in control organoids, underscoring the effectiveness  
186 of iPSC-based models in uncovering genetic background-specific susceptibility to EDC  
187 exposure (Extended data Figure 1e).

188 Finally, we probed the cellular-level impact of MIX N on the SH-SY5Y human  
189 neuroblastoma line whose ability to undergo rapid differentiation *in vitro* (including  
190 formation of growth cones and elongated neurites with nodes) has established it as a  
191 relevant model in toxicology<sup>19</sup>. Image analysis of SH-SY5Y cultures treated with MIX N  
192 at 6 concentrations for 4d revealed a significant relative increase of more mature,  
193 extended node-bearing neurites (Figure 2n) and, consistently, increased expression of

194 the growth cone-associated gene *GAP43* (Figure 2o), pointing to EDC-induced  
195 premature differentiation including dysregulated axonogenesis.

### 196 *MIX G disrupts human metabolic pathways*

197 Following the same logic applied to MIX N, we evaluated the molecular impact of MIX G  
198 on two growth/metabolism-relevant human models, bone marrow-derived mesenchymal  
199 stem cells (adult MSCs) and iPSC-derived mesenchymal stem cells (iPSC-MSC) which  
200 display comparable molecular hallmarks (Figure 3a), allowing validation across  
201 experimental systems.

202 Both MSC models were exposed to increasing concentrations of MIX G for 48h and  
203 profiled by RNA-Seq. In both systems DEGs grouped in two clusters, showing dose-  
204 dependent increases or decreases upon MIX G exposure (Figure 3b). Notably, clusters  
205 were very similar for the two different MSC sources but considerably different from those  
206 identified in the neurodevelopmental systems with MIX N, pointing to the robust capture  
207 of tissue-specific responses across experimental systems.

208 The unbiased DEGs from the merged MSC analysis were significantly enriched for GO  
209 terms related to chromatin regulation (Figure 3c), while DEGs in the two different  
210 clusters were enriched for extracellular matrix organization (downregulated genes) or  
211 cell cycle processes and chromatin regulation (upregulated genes) terms (Extended  
212 data Figure 1f). Importantly, EDC-dependent dysregulation included specific well-  
213 established genes linked to adipogenesis or osteogenesis (Figure 3d) and genes  
214 associated with birth weight and obesity through Genome Wide Association Studies  
215 (GWAS) (Figure 3e).

216 We probed a functional readout of these molecular alterations by exposing adult MSCs  
217 to the same doses of MIX G for 21 days and staining lipid droplets with Bodipy 493/503.  
218 In line with the epidemiological and transcriptional outcomes, MIX G significantly  
219 enhanced adipogenic differentiation at 1X concentration (Figure 3f) with increased  
220 PPAR $\gamma$  expression, a master regulator of adipocytic differentiation, after 14 days of  
221 exposure (Extended data Figure 1g).

### 222 *Dissecting the impact of MIX N versus MIX G on human development*

223 Despite having similar chemical compositions, MIX N and MIX G had been linked to  
224 different health outcomes on the basis of epidemiological evidence. We thus sought the  
225 molecular basis of this distinction by cross-exposure of representative models to the  
226 alternative mixture. HFPNSC were exposed to MIX G, using the same five dilutions as  
227 for MIX N. As expected, the two mixtures showed a general transcriptomic impact of  
228 similar magnitude (369 unbiased DEGs for MIX N versus 275 for MIX G) and with  
229 significant overlap of the DEGs ( $p \sim 1e-3$ ). Strikingly however, the mixtures showed  
230 marked differences in the affected genes, in particular with respect to ASD and ID  
231 associated targets that were only significantly enriched in MIX N DEGs (Figure 4a),  
232 consistent with the association of MIX N exposure to early verbal skills. Moreover, even  
233 those DEGs associated with ASD or ID that were altered by both MIX N and MIX G  
234 were impacted at the lowest doses of MIX N but only at the highest doses of MIX G  
235 (Figure 4b).

236 Finally, to evaluate the specificity of MIX N and MIX G on cellular responses, we  
237 compared their effects on neurite outgrowth and *GAP43* expression in SH-SY5Y cells

238 and on lipid droplet accumulation in adult MSCs, respectively. Contrary to MIX N (Figure  
239 2n+o), MIX G had no effect either on cell morphology or *GAP43* expression (Figure  
240 4c+d). Similarly, whereas adult MSCs exposed to MIX G showed significant increase in  
241 lipid accumulation already at 1X (Figure 3f), MIX N showed significant increase only at  
242 100X and only in the male line (Figure 4e).

243 Together, these results provide experimental evidence of the mixture-to-phenotype  
244 dissection that had been originally only inferred at the population level, establishing the  
245 power of such integrated approaches for defining the molecular traces of EDC exposure  
246 across the population, organismal and cellular scales.

247  
248 *MIX N and Mix G disrupt thyroid hormone signalling and related behaviour in*  
249 *developmental in vivo models*

250 Having determined the markedly specific impact of MIX N and MIX G in the *in vitro*  
251 systems, we reasoned that *in vivo* key endocrine pathways might be disrupted by both  
252 mixtures but with specific downstream consequences. We thus probed the thyroid  
253 hormone (TH) axis as paradigmatic candidate for convergent dysregulation, given its  
254 essential roles in both brain development<sup>20</sup> and metabolism<sup>21</sup> and previous  
255 epidemiological<sup>22,23</sup> and experimental<sup>24</sup> evidence implicating the main chemical classes  
256 present in both mixtures as TH disruptors<sup>25</sup>.

257 The TH disrupting capacity of the mixtures was investigated using the *Xenopus*  
258 Embryonic Thyroid Assay (XETA)<sup>26</sup>, which serves as an endpoint assay for TH  
259 disruption at multiple levels (synthesis, transport and metabolism). TH signaling is well

260 conserved across vertebrates; early stage *Xenopus* embryos are TH sensitive and  
261 metabolically competent<sup>27</sup>, making them a tractable model for assessing thyroid  
262 disruption. One-week old transgenic tadpoles, harboring a GFP thyroid responsive  
263 element construct, were exposed for 72h with or without TH. The mixture was renewed  
264 daily, and GFP expression levels quantified (Figure 5a+b). Interestingly, both mixtures  
265 altered TH availability in the brain, thereby providing insight into the potential adverse  
266 outcomes observed in human cohorts. Exposure to MIX N at concentrations 1X, 10X,  
267 100X, and 1000X resulted in significant reduction in fluorescence at concentrations 1X  
268 and 10X. This decreased TH availability acquires human relevance when placed in the  
269 context of epidemiological results<sup>28</sup>, as slight changes in maternal TH levels during early  
270 pregnancy results in IQ loss and modified brain structure in offspring. Similarly,  
271 exposure to MIX G significantly decreased fluorescence at 10X and 100X (Figure 1c).  
272 To further investigate the effects of each mixture, neural gene expression of 3 day-  
273 exposed tadpoles was analysed by RT-qPCR. MIX N exposure decreased the  
274 expression of the TH receptor, *thra*, at 10X and 100X concentrations and the TH-  
275 transporter, *oatp1c1*, at 10X (Figure 5c). When tested with a 5 nM T<sub>3</sub> spike, 1000X MIX  
276 N downregulated expression of 4 genes involved in the TH signalling pathway; *dio3*,  
277 *thibz*, *thrb* and *kif9* (Extended data Figure 3b). Exposure to MIX G also affected TH  
278 targets, significantly increasing *kif9* mRNA levels at 1X and 100X (Extended data Figure  
279 2b), whilst significantly decreasing levels of *thibz* and *dio3*, at 1000X when tested with a  
280 5 nM T<sub>3</sub> spike (Extended data Figure 3e).  
281 To confirm the impact of the mixtures on the thyroid system in an additional toxicology-  
282 relevant *in vivo* model, we assessed expression of TH-related genes in zebrafish (*Danio*

283 *rerio*) larvae. Zebrafish embryos were exposed to MIX N or MIX G for 48h (72 hpf-120  
284 hpf) and expression levels determined by RT-qPCR (Figure 5e). MIX N exposure  
285 significantly decreased expression of both TH receptors, *thra* and *thrb*, at 100X (Figure  
286 5f). Remarkably, MIX N exposure also downregulated the homologs of two particularly  
287 relevant DEGs affected in the human neurodevelopmental systems (Extended data  
288 Figure 3c) i) *kmt2d*, whose mutations cause Kabuki syndrome, a well-established  
289 neurodevelopmental disorder, encoding a histone H3 lysine 4 methyltransferase that  
290 competes with NCOR (a well-documented TH co-repressor) to regulate chromatin status  
291 and Notch targets<sup>29</sup>; and ii) *gatad2b*, encoding p66, a subunit of the NuRD chromatin  
292 remodelling complex whose interference relieves TH-mediated transcriptional  
293 repression<sup>30</sup>. MIX G exposure also affects TH signaling, significantly increasing  
294 expression of *thra* (Figure 1c), and deiodinases *dio1* and *dio2* as well as *thrb* at 0.1X  
295 and 1X (Extended data Figure 2e).

296 Finally, to establish the organismal-level impact of the mixtures on relevant behaviors,  
297 we used locomotor assays to assess TH-disrupting effects, given the prominent role of  
298 TH in maturation of the central and peripheral nervous system<sup>20</sup>. We analyzed light-  
299 induced locomotion in *Xenopus* tadpoles after 72h MIX N or MIX G exposure. Mobility  
300 was significantly decreased following exposure to MIX N at 10X, 100X and 1000X  
301 (Figure 5d) and MIX G at 1X, 10X and 100X (Extended data Figure 2c). In Zebrafish  
302 larvae, in which activity increases in darkness periods and abates in light<sup>31</sup>, behavioural  
303 effects were assessed after 48h exposure to MIX N and MIX G revealing significant  
304 induction of mobility during dark periods following exposure to 100X MIX N (Figure 5g).  
305 A tendency to hyperactivity was also seen at 10X, but this did not reach statistical

306 significance. Similarly, mobility was significantly induced after 100X exposure to MIX G  
307 (Extended data Figure 2f). The contrasting responses to mixture exposure between the  
308 two models is expected to be related to documented differential timings of TH-  
309 dependent processes within the maturing brain and periphery for the two species<sup>32</sup>.  
310 Taken together, these results demonstrate TH-disrupting effects of MIX N and MIX G at  
311 molecular and physiological levels, at concentrations measured and associated with  
312 adverse outcomes in humans.

### 313 *The thyroid axis is a key site of vulnerability to MIX N and MIX G*

314 Key genes involved in TH signaling, such as *thra*, *thrb* and *klf9*, were dysregulated in  
315 both *Danio rerio* and *Xenopus laevis* embryos. We therefore selected these as starting  
316 points to visualize pathways linking TH-signaling to the DEGs identified in HPFNCS  
317 exposed to MIX N and G (Figure 6), using the Genomatix Pathway System (GEPS)  
318 program. This software determines interactions through both publically available and in-  
319 house data<sup>33, 34</sup>. Of the 1,848 DEGs identified in HPFNCS under MIX N exposure, we  
320 focused on the 185 genes implicated in neurodevelopmental disorders. THRA, THRB or  
321 KLF9 (Figure 6, green box) were directly or indirectly linked to 12 of these DEGS (Figure  
322 6, blue box) (see Supplementary Table 1 for interactions), including genes encoding  
323 three main THR-comodulators, namely, *NCOA1*<sup>35</sup>, *CREBBP*<sup>36</sup> and *SIN3A*<sup>37</sup> which are  
324 associated with neurodevelopmental delay when mutated. These results highlight  
325 specific genes as critical hubs of disruption by common environmental chemicals that  
326 are conserved across toxicological models<sup>24,38</sup>. TH signaling is also an essential player  
327 in growth<sup>39</sup> and metabolic control<sup>21</sup>. Both GH and IGF pathways interact with and are

328 controlled by TH at multiple levels<sup>40</sup>. We therefore applied a similar approach to the  
329 DEGs identified in adult MSCs following exposure to MIX G. Twenty one key DEGS  
330 were identified as regulated by either THRA, THRB or KLF9 (Figure 6, orange box). For  
331 instance, THRB binds TP53<sup>41</sup>, a transcription factor that directly inhibits ERCC6  
332 activity<sup>42</sup> and mutations of ERCC6 are associated with slow growth<sup>43</sup>. THRB also binds  
333 SRC<sup>44</sup>, which directly phosphorylates CAV1<sup>45</sup>. Mutations in CAV1 correlate with insulin  
334 resistance<sup>46</sup>. Further, KLF9 is a direct regulator of TCF7L2<sup>47</sup>, a diabetes-susceptibility  
335 gene<sup>48</sup>.

336

## 337 **Discussion**

338 The current vision for improving regulatory decision making relies on the transforming  
339 potential of high throughput and high content data to elucidate and quantify the  
340 molecular, cellular and organismal responses to chemicals<sup>49</sup>. In the context of chemical  
341 regulation most authorities, including the Organisation for Economic Co-operation and  
342 Development (OECD), recommend integrated approaches to testing and assessment  
343 (IATA) that incorporate results from multiple methodologies. Emphasis is placed on  
344 molecular initiating events (MIE) that lead to physiologically measurable adverse  
345 outcome pathways (AOP). Here we first identify the adverse outcomes (language delay  
346 or low birth weight) in humans, then proceed to determine the prenatal chemical  
347 mixtures associated with these outcomes in children and, finally, establish the causative  
348 molecular and cellular impacts using *in vitro* and *in vivo* models. By making EDC  
349 mixtures experimentally tractable as the 'real life'-relevant unit of exposure, these  
350 complementary methodologies allowed us to uncover the gene networks specifically



351 altered by neurodevelopment- or growth-targeting EDC mixtures and define thyroid  
352 function as a key and unifying axis of vulnerability to both mixtures. Furthermore, by  
353 establishing the value of human reprogrammed models based on self-renewing sources,  
354 we both expand their reach to regulatory toxicology and enrich the latter experimental  
355 human insight.

356 Together, this approach allowed us to define dysregulated gene networks, identified and  
357 validated through complementary methods, that can be exploited to link,  
358 mechanistically, MIEs to AOPs. As such we expect the methodology and approach to be  
359 broadly applicable within the new regulatory frameworks globally.

360

361 **METHODS**

362 Detailed protocols and methods descriptions including references can be found in the  
363 supplementary information (SI).

364

365 **Exposure assessment.** Using data from the Swedish Environmental Longitudinal  
366 Mother and child Asthma and allergy (SELMA) pregnancy cohort<sup>8</sup> (described in SI),  
367 mixtures of prenatal EDC exposures of relevance for health outcomes in children were  
368 identified. Exposure was measured in urine and serum taken in week 3-27 of pregnancy  
369 (median week 10, and 96% of the samples were taken before week 13). First morning  
370 void urine samples were analyzed for 10 phthalate metabolites (Mono-ethyl phthalate  
371 (MEP), metabolite of DEP; Mono-n-butyl phthalate (MnBP), metabolite of DBP; Mono-  
372 benzyl phthalate (MBzP), metabolite of BBzP; Mono-(2-ethylhexyl) phthalate (MEHP),  
373 Mono-(2-ethyl-5-hydroxyhexyl) phthalate (MEHHP), Mono-(2-ethyl-5-oxohexyl)  
374 phthalate (MEOHP), Mono-(2-ethyl-5-carboxypentyl) phthalate (MECPP), metabolites of  
375 DEHP; Mono-hydroxy-iso-nonyl phthalate (MHiNP), Mono-, oxo-iso-nonyl phthalate  
376 (MOiNP), Mono-carboxy-iso-octyl phthalate (MCiOP), metabolites of DiNP); and alkyl  
377 phenols including Bisphenol A (BPA) and Triclosan (TCS)). Serum samples were  
378 analyzed for 8 perfluorinated alkyl acids (perfluoroheptanoic acid (PFHpA),  
379 perfluorooctanoic acid (PFOA), perfluorononanoic acid (PFNA), perfluorodecanoic acid  
380 (PFDA), perfluoroundecanoic acid (PFUnDA), perfluorododecanoic acid (PFDoDA),  
381 perfluorohexane sulfonate (PFHxS) and perfluorooctane sulfonate (PFOS)) as  
382 described in SI and publications therein.

383 **Health examinations.** For a measure of metabolism and growth in the children, we  
384 used birth weight data from the Swedish national birth register. For a measure of  
385 neurodevelopment we used data from a routinely made language screening of the  
386 children when they were 30 months old. Language development was assessed by  
387 nurse's evaluation and parental questionnaire, including the number of words the child  
388 used (<25, 25-50 and >50). A main study outcome was parental report of use of fewer  
389 than 50 words, termed language delay (LD) corresponding to a prevalence of 10%.

390  
391 **Biostatistic analyses.** Weighted quantile sum (WQS) regression<sup>9</sup>, adjusted for  
392 covariates, was used to establish associations between mixture exposures and lower  
393 birth weight or language delay in children (see SI). In short, WQS regression is a  
394 strategy for estimating empirical weights for a weighted sum of concentrations most  
395 associated with the health outcome. The results are a beta coefficient associated with  
396 the weighted sum (estimate, SE and p value) and the empirical weights (which are  
397 constrained to sum to 1). The components most associated with the health outcomes  
398 have non-negligible weights, and were treated as "bad actors".

399 Next, we estimated the equivalent daily intake (DI) of "bad actors" measured in the urine  
400 (i.e., phthalates and alkyl phenols), and estimated serum concentrations from the DI for  
401 these urinary measurement-based compounds (see SI). Finally, we used the geometric  
402 means, on a molar basis, for either the measured (PFAAs) or estimated serum levels  
403 (phthalates and alkyl phenols) and established mixing proportions to prepare one  
404 mixture associated to low birth weight (MIX G) and one associated to language delay  
405 (MIX N). These two mixtures were used in the experimental validation.

406 **Composition of the mixtures.** The chemicals needed for the mixtures were obtained  
407 from commercial custom synthesis laboratories or vendors BPA, Dimethylsulfoxide  
408 (DMSO), MBzP, PFHxS, PFNA, PFOA and PFOS were obtained from Sigma-Aldrich  
409 Inc. (St. Louis, MO, USA). Triclosan was purchased from Dr. Ehrenstorfer (Augsburg),  
410 MEP and MiNP were obtained from Toronto Research Chemicals (North York, ON,  
411 Canada). MBP and MEHP were purchased from TCI, Tokyo Chemical Industry Co., Ltd  
412 (Japan). For MIX N, 1M solutions in DMSO were prepared using, MEP, MBP, MBzP,  
413 MiNP, BPA, PFHxS, PFNA, PFOS. For MIX G, 1M solutions in DMSO were prepared  
414 using, MEP, MBP, MBzP, MEHP, MINP, Triclosan, PFHxS, PFOA, and PFOS.  
415 Thereafter, the 1M solutions were mixed in proportions as described SI.

416  
417 **Cell lines.** Human induced pluripotent stem cells have been previously validated in Dr.  
418 Giuseppe Testa`s laboratory. hiPSCs were cultured on plates coated with human  
419 qualified Matrigel (BD Biosciences) diluted 1:40 in DMEM-F12, in the following cell  
420 culture media: mTeSR1 medium (StemCell Technologies). Two iPSC lines, CTL1R-3  
421 and WBS2-C2 were used for the experiments.

422 Human foetal primary neural stem cells (HFPNSC) were provided by Dr. Steve Pollard`s  
423 laboratory. They were derived from the cortex of post-conception week 11, male embryo  
424 and from the ganglionic eminence of post-conception week 8, male embryo.

425 The SH-SY5Y human neuroblastoma cell line was provided by Dr. June L. Biedler and  
426 cultured as described in SI.

427 Adult human bone marrow derived mesenchymal stem cells (hMSCs) from 2 donors  
428 were a kind gift of Dr. Katarina Leblanc (Center of Hematology and Regenerative

429 Medicine, Department of Medicine, Karolinska Institutet, Sweden) and were cultured in  
430 Dulbecco's Modified Eagle's medium (DMEM, Gibco ® by Life technologies)  
431 supplemented with 10% heat-inactivated fetal bovine serum (FBS) (Gibco® by Thermo  
432 Fisher Scientific) (see also SI). Human induced pluripotent stem cell-derived  
433 mesenchymal stem cells (hiPSC-MSCs) were obtained and cultured from neural crest  
434 stem cells derived from iPSCs in Dr. Giuseppe Testa's laboratory (IEO, Milan Italy) as  
435 described in SI and references therein.

436

437 **Cell differentiation and treatment.** For the induction of neuronal differentiation of  
438 iPSC, two protocols were followed. For generating Ngn2-driven neuronal precursors the  
439 protocol described by Zhang et al.,<sup>16</sup> was followed and some improvements were made  
440 in Dr. Giuseppe Testa's laboratory (IEO, Milan Italy). Clonal cell lines were derived from  
441 the infection by splitting the infected bulk and plating single cells in separate wells of a  
442 96-well plate. This was achieved by sorting DAPI-negative cells in the plate and waiting  
443 for them to grow as colonies, then passaging them progressively increasing the dish  
444 size, until they were safely frozen. The differentiation protocol was carried out without  
445 using astrocytes inside the culture plate giving us the opportunity to avoid the important  
446 loss of sequencing reads that usually account for astrocytic cells. To overcome their  
447 absence, culture media was conditioned for 48 hours in mouse astrocytes coated dishes  
448 before using it for differentiating cells. In transcriptomic experiments the stable lines  
449 were seeded in 6 well plates ( $2 \times 10^5$  cells/well) and then differentiated toward the  
450 neuronal lineage following the published protocol steps. At the 5<sup>th</sup> day of differentiation,

451 DMSO or MIX N in 5 different concentrations were diluted in the culture media and  
452 added to the cells for 48 hours.

453 For generating human cortical organoids the protocol described by Pasca et al.,<sup>17</sup> was  
454 followed and some improvements were made in Dr. Giuseppe Testa`s laboratory (IEO,  
455 Milan Italy) to improve the apoptotic core that usually characterize the inner part of the  
456 organoids. The GSK-3b inhibitor CHIR99021 was added to the culture media from the  
457 time of generation of embryoid bodies. Since the 14<sup>th</sup> day of differentiation, dishes were  
458 positioned on a shaker inside the incubator. For transcriptomic experiments, on the 16<sup>th</sup>  
459 day of differentiation 3 organoids were plated in each well of a 6 well ultra-low  
460 attachment plate, DMSO or MIX N in 5 different concentrations was diluted in the culture  
461 media and added to the organoids for 48 hours.

462 HFPNSC were seeded in 6 well plates. When confluency was reached DMSO or MIX N  
463 or MIX G in 5 different concentrations was added to the culture media and used to  
464 culture cells for 48 hours.

465 For experiments with SH-SY5Y, the cells were seeded at a density of 3600 cells/cm<sup>2</sup> in  
466 complete culture medium. MIX G and N were added at the time of seeding (0 h) and 48  
467 h later before harvest at 96 h. Ten µM all-trans retinoic acid (ATRA) was added 24 h  
468 after seeding as a positive control.

469 For the induction of adipogenic differentiation, cells were seeded in 96 well plates (2x10<sup>4</sup>  
470 cells/cm<sup>2</sup>) and allowed to expand until they reached 80% confluence. Two days before  
471 MIX G/N treatment or initiation of adipogenic induction, growth media was replaced by  
472 treatment media consisting of DMEM supplemented with 10% charcoal stripped FBS,

473 1% penicillin/streptomycin and 2% glutamine. Subsequently, treatment was performed  
474 for 21 days whereby medium was changed twice a week.

475  
476 **RNA sequencing.** Total RNA was isolated with the RNeasy Micro Kit (Qiagen, Hilden,  
477 Germany) according to the manufacturer's instructions. RNA was quantified with  
478 Nanodrop and then the integrity was evaluated with Agilent 2100 Bioanalyzer (only if the  
479 quality ratios were not optimal after Nanodrop analysis). TruSeq Stranded Total RNA LT  
480 Sample Prep Kit, Illumina was used to run the library for each sample. Spike-ins (ERCC  
481 RNA Spike-in control Mixes, Life Technologies) were added to the sample before  
482 proceeding with the protocol to validate the process. Sequencing is performed with the  
483 Illumina HiSeq 2000 platform, sequencing on average 10 millions 50bp paired-end  
484 reads per sample.

485  
486 **RNA-seq data analysis.** RNA-seq quantification was performed directly from the reads  
487 using Salmon 6.1, using the hg38 Refseq annotation complemented with the sequences  
488 of ERCC spike-ins. Only genes with at least 20 reads in each of at least 2  
489 concentrations of the mixture using the same cell lines were included for further  
490 analysis; small (<200nt) genes, ribosomal RNA genes, and fusion genes were excluded.  
491 Differential expression analysis was performed on the estimated counts after TMM  
492 normalization with edgeR v.3.12.1 using a likelihood ratio test on the coefficients of a  
493 negative binomial model including the genetic background and the mix' concentration  
494 (i.e., ~line+concentration). For the first, unbiased analysis, the concentration was treated  
495 as a categorical variable (i.e., converted to factor), and tested for any non-zero

496 coefficient. Genes identified through this method were then kmeans-clustered on the  
497 basis of their smoothed fold change upon each concentration (using the NbClust R  
498 package to determine the consensus number of clusters). The mean smoothed fold  
499 change pattern for the main cluster(s) were then used as an independent continuous  
500 variable for a second test retrieving more genes following the same pattern.

501  
502 **Enrichment analysis.** Gene Ontology (GO) enrichment analyses were performed with  
503 the goseq R package, including correction for eventual RNA-seq transcript-length bias  
504 and excluding genes without annotation. Terms with at least 10 but no more than 1,000  
505 associated genes were considered, and Fisher's exact test was used. The tested genes  
506 (excluding small and lowly-expressed genes) were used as a background. Parent terms  
507 with significantly enriched children terms were filtered out to improve the specificity of  
508 the enrichments. Unless stated otherwise, other enrichment tests were performed using  
509 the hypergeometric test.

510  
511 **Immunohistochemistry for neuronal systems.** Protocols and antibodies used for  
512 immunohistochemistry are described in SI.

513  
514 **RNA extraction and quantitative PCR.** Protocols and primer sequences uses for RNA  
515 extraction and qPCR analyses for all systems are described in SI.

516  
517 **Neurite morphology in SH-SY5Y cells.** Cells were seeded in 35 mm dishes and  
518 exposed to 0.01 % DMSO or the indicated concentrations of MIX N or MIX G, or ATRA



519 as described above. After 96 hours the living non-fixated cells were examined under an  
520 inverted phase contrast microscope (Leica DMI6000B, Germany) and ten to fourteen  
521 fields per condition were photographed. Morphological assessments of 150 to 200 cells  
522 per condition and experiment using the ImageJ software (NIH shareware, v 1.49) were  
523 made with the observer blinded to treatment. The cell morphology was judged according  
524 to criteria scoring for sprouts, neurites (protrusions longer than one cell body diameter)  
525 without nodes and more mature neurites containing nodes. Statistical analysis for dose-  
526 response patterns using ANOVA was done for individual neurite types and ratios  
527 thereof.

528

529 **Bodipy 493/503 and Hoechst 33342 staining.** Cells were seeded in black-walled 96  
530 well plates with  $\mu$ CLEAR bottom (Greiner Bio One) and exposed to DMSO or the  
531 indicated concentrations of MIX G or N as described above. Staining was performed as  
532 described in SI and references therein. Images were acquired immediately using the  
533 Image Xpress Micro High-Content Analysis System (Molecular Devices, Sunnyvale  
534 California USA). Images were taken in FITC and DAPI channel at 10x magnification, at  
535 16 sites per well. Images were further analyzed with the MetaXpress High-Content  
536 Image Acquisition and Analysis software (Molecular Devices, Sunnyvale California  
537 USA). Using the Transfluor HT analysis module nuclei were counted and lipid droplets  
538 were quantified. Integrated granule intensity per image was normalized to nuclei count.  
539 Mean values of all images from six replicate wells were compared among different  
540 treatments.

541

542 **X. laevis rearing and strains.** The used methods, care and treatment of *Xenopus*  
543 *laevis* in this study was in accordance with institutional and European guidelines  
544 (2010/63/UE Directive 2010) and the local ethic committee (Cometh: Comité d’Ethique  
545 en matière d’expérimentation animale) under the project authorizations No. 68-039.  
546 Heterozygous *X. laevis* tadpoles used for the XETA (Xenopus Embryonic Thyroid  
547 Assay) were obtained by crossing adult homozygous *Tg(thibz:eGFP)* with wild type  
548 animals. Wild type (naive) tadpoles were obtained by crossing wild type (WT) adults.  
549 Sexually mature males were mated with females that were injected the day before with  
550 500-800U of human chorionic gonadotropin (Chorulon, France). Selected tadpoles were  
551 sorted according to the developmental stages.

552  
553 **Exposure of X.laevis.** Triiodothyronine (T3, Sigma-Aldrich, Saint-Quentin Fallavier,  
554 France) was prepared in 70% milliQ Water, 30% NaOH, at  $10^{-2}$ M, aliquoted in volumes  
555 of 100 $\mu$ L in 1.5mL low binding Eppendorf (100% polypropylene) tubes and stored at -  
556 20°C until use. For XETA and qPCR analyses, 15 tadpoles per well (stage NF45 e.g., 1  
557 week old) were incubated in a 6-well plate (TPP, Switzerland). Each well contained 8  
558 mL of exposure solution made of Evian water (or T3 5.10-9M prepared in Evian) and  
559 DMSO (containing or not mixtures at different concentrations). These exposure  
560 solutions were extemporaneously prepared in Greiner (France) polypropylene tubes (50  
561 mL tubes) and transferred in the wells Final DMSO concentration was 0.01% in all  
562 treatment groups. The exposure time was 72 hours in the dark at 23°C with 24-hour  
563 renewal. MIX N and MIX G screenings were done in presence or absence of T3 5.10-  
564 9M except for mobility experiments (only absence of T3). After 72h exposure, tadpoles

565 were rinsed and tested for mobility or anesthetized with 0.01% tricaine  
566 methanesulfonate (MS222, Sigma-Aldrich, Saint-Quentin Fallavier, France) either for  
567 fluorescent screening (XETA) or euthanized in 0.1% MS-222 for brain gene expression  
568 analysis.

569

570 **Image Analysis for Xenopus Embryonic Thyroid Assay (XETA).** Images were  
571 captured for fluorescence quantification. All pictures of a group were stacked, and  
572 processed as described<sup>24</sup>. Five independent experiments were performed for each  
573 mixture providing comparable results. GraphPad Prism 7 software was used for  
574 statistical analysis. All values were normalized (100%) to either CTRL group or T3 when  
575 mixtures were tested in co-exposure. Results are expressed as scatter dot blots with  
576 mean +/- SEM. A d'Agostino and Pearson normality test was carried out to determine  
577 distribution of values in each of the exposure groups. If normal distribution was found, a  
578 one-way ANOVA and Dunnett' post-test was applied. If one of the compared groups did  
579 not pass the normality test, a Kruskal-Wallis test with Dunn's post-test was applied. All  
580 groups were compared to the appropriate control group.

581

582 **X.laevis mobility.** Wild type *X.laevis* embryos NF45 underwent 72h mixture exposure  
583 as described above. Mobility was recorded by the DanioVision (Noldus, Wageningen,  
584 The Netherlands) behaviour analysis system. Tadpoles were first rinsed and placed  
585 individually in 12-well plates (TPP, Switzerland) filled with 4 mL of Evian and put under  
586 the infrared camera. Tadpoles had 5 minutes in dark to accommodate before starting  
587 the protocol. Light inside the box was turned –on and –off at a regular 30 second

588 interval, giving the tadpoles an external stimulus. The total distance travelled by each  
589 tadpole within the well was recorded for a total of 10 minutes. Analysis was done with  
590 EthoVision software (11.5, Noldus, Wageningen, The Netherlands). Normalization was  
591 done for each experiment on the CTRL value of distance done after 10 first sec. Three  
592 independent experiments were done with  $7 < n < 12$  per condition per experiment. A pool  
593 of the three experiments is presented. Differences between CTRL and different mixture  
594 concentrations were analysed using non- parametric Kruskal Wallis' test followed by  
595 Dunn's post test for each time point or with parametric one-way ANOVA with Dunetts  
596 post test. Differences were considered significant at  $p < 0.05$  (\*),  $p < 0.01$  (\*\*),  
597  $p < 0.001$  (\*\*\*) and  $p < 0.0001$  (\*\*\*\*).

598 **Zebrafish husbandry.** All fish were treated in accordance with Swedish ethical  
599 guidelines with the ethical permit (Dnr 5.2.18-4777/16) granted by the Swedish Board of  
600 Agriculture. AB-strain zebrafish (*Danio rerio*), obtained from SciLifeLab (Uppsala,  
601 Sweden) were kept in a recirculating ZebTEC system (Tecniplast, Italy) at the University  
602 of Gothenburg. Fish were maintained at 26 °C with a 14:10 h light/dark cycle and fed *ad*  
603 *libitum* two times daily. Before embryo collection, two adult males and two females were  
604 placed in breeding tanks, separated by a transparent barrier and left overnight. The  
605 barrier was removed shortly before onset of light the next morning and fish were allowed  
606 to breed. Fertilized eggs were collected within 60 min of spawning, rinsed and kept at  
607 28°C in autoclaved zebrafish embryo medium with daily medium changes until exposure  
608 was initiated. Embryo medium consisted of 245 mg/L MgSO<sub>4</sub>·7H<sub>2</sub>O, 20.5 mg/L KH<sub>2</sub>PO<sub>4</sub>,  
609 6 mg/L Na<sub>2</sub>HPO<sub>4</sub>, 145 mg/L CaCl<sub>2</sub>·2H<sub>2</sub>O, 37.5mg/L KCl and 875 mg/L NaCl in milliQ  
610 Water.

611  
612 **Exposure of zebrafish.** Healthy embryos from a minimum of three different breeding  
613 pairs were selected and randomly mixed for exposures to account for inter-population  
614 variability (OECD guidelines 236, 2013). The MIX N and G exposure solutions were  
615 prepared by serial dilution in glass Erlenmeyer flasks and the final dimethylsulfoxide  
616 (DMSO) concentration in all treatments was 0.01%. At 72 hpf, embryos were moved to  
617 glass petri dishes containing 30 mL exposure solution (MIX G/N or vehicle control in  
618 embryo medium) and incubated for 48h at 28°C with a 14:10 h light/dark cycle. Three  
619 replicates with 20-25 embryos per concentration were used and each experiment was  
620 independently repeated 3 times. After exposure, embryos were moved to 48-well plates  
621 and tested for mobility or collected for gene expression analysis.

622  
623 **Zebrafish larvae mobility.** Mobility of 5 dpf larval zebrafish after 48h exposure (72 hpf-  
624 120 hpf, as described above) was recorded with the View Point® automatic behaviour  
625 tracking system (ViewPoint Life Science, Montreal, CN) and an infrared camera. Larvae  
626 were transferred to individual wells in 48-well plates with 500 µl solution per well. Each  
627 plate contained individuals from each exposure concentration and was considered to be  
628 a technical replicate. After 15 minutes of initial acclimatization in light, locomotion was  
629 induced with alternating light/dark cycles (5 min/5 min)<sup>26</sup>. Distance travelled was  
630 recorded for a total of 40 minutes and analysed with the View Point® Zebralab software  
631 (ViewPoint Life Science, Montreal, CN). Values were normalized on the Control group  
632 value of distance travelled during the first 60 sec. For every exposure concentration,  
633 three independent experiments with three technical replicates (6 to 8n per replicate)

634 each were performed. A pool of the three experiments is presented. Differences  
635 between Control and mixture concentrations were analysed with nonparametric Kruskal  
636 Wallis' test or one-way ANOVA for each time point. Differences were considered  
637 significant at  $p < 0.05$  (\*),  $p < 0.01$  (\*\*) and  $p < 0.001$  (\*\*\*)).

638

639 **Gene Network Analyses.** 185 from a total of 1848 identified DEGs in HFPNSC were  
640 manually selected through literature search to be implicated in neurodevelopmental  
641 delay or ASD. 111 from a total of 3617 identified DEGs in both adult MSCs and iPSC-  
642 derived MSCs were selected to be important in growth or metabolism. *Thra*, *thrb* and  
643 *klf9* were used as starting points to possibly connect the above described DEGS from  
644 different *in vitro* systems in their respective fields. For connections analyses, the  
645 Genomatix software was used (<http://www.genomatix.de>) combining mining sources  
646 such as MatInspector and Genomatix Pathway Systems (GePS). In GePS, genes were  
647 mapped into networks based on the information extracted from public databases. For  
648 the analyses 'expert level' was used to generate the network. Here gene pairs are noted  
649 if they are manually curated interactions from Genomatix experts reviewing the original  
650 literature. The MatInspector software utilizes a library of matrix descriptions for  
651 transcription factor binding sites to locate matches in DNA sequences. For interactions  
652 see Supplementary Table 1.

653

654

655

## 656 **References**

- 657 1. Centers for Disease Control and Prevention. Atlanta (GA): US Department of Health and  
658 Human Services. *National Center for Chronic Disease Prevention and Health Promotion*  
659 (2014).
- 660 2. WHO. State of the science of endocrine disrupting chemicals 2012: an assessment of the  
661 state of the science of endocrine disruptors prepared by a group of experts for the United  
662 Nations Environment Programme and World Health Organization. *Geneva, WHO* (2013).
- 663 3. Kortenkamp, A. Low dose mixture effects of endocrine disrupters and their implications for  
664 regulatory thresholds in chemical risk assessment. *Curr. Opin. Pharmacol.* **19**, 105–111  
665 (2014).
- 666 4. Miniscalco, C., Nygren, G., Hagberg, B., Kadesjö, B. & Gillberg, C. Neuropsychiatric and  
667 neurodevelopmental outcome of children at age 6 and 7 years who screened positive for  
668 language problems at 30 months. *Developmental Medicine & Child Neurology* **48**, 361–366  
669 (2006).
- 670 5. Kopec, G., Shekhawat, P. S. & Mhanna, M. J. Prevalence of diabetes and obesity in  
671 association with prematurity and growth restriction. *Diabetes Metab. Syndr. Obes.* **10**, 285–  
672 295 (2017).
- 673 6. Bornehag, C.-G. *et al.* The SELMA study: a birth cohort study in Sweden following more  
674 than 2000 mother-child pairs. *Paediatr. Perinat. Epidemiol.* **26**, 456–467 (2012).
- 675 7. Carrico, C., Gennings, C., Wheeler, D. C. & Factor-Litvak, P. Characterization of Weighted  
676 Quantile Sum Regression for Highly Correlated Data in a Risk Analysis Setting. *JABES* **20**,  
677 100–120 (2015).
- 678 8. Anderson, O. S. *et al.* Epigenetic responses following maternal dietary exposure to

- 679 physiologically relevant levels of bisphenol A. *Environ. Mol. Mutagen.* **53**, 334–342 (2012).
- 680 9. Vandenberg, L. N. *et al.* Hormones and endocrine-disrupting chemicals: low-dose effects  
681 and nonmonotonic dose responses. *Endocr. Rev.* **33**, 378–455 (2012).
- 682 10. De Rubeis, S. *et al.* Synaptic, transcriptional and chromatin genes disrupted in autism.  
683 *Nature* **515**, 209–215 (2014).
- 684 11. Vissers, L. E. L. M., Gilissen, C. & Veltman, J. A. Genetic studies in intellectual disability  
685 and related disorders. *Nat. Rev. Genet.* **17**, 9–18 (2016).
- 686 12. Deciphering Developmental Disorders Study. Prevalence and architecture of de novo  
687 mutations in developmental disorders. *Nature* **542**, 433–438 (2017).
- 688 13. C Yuen, R. K. *et al.* Whole genome sequencing resource identifies 18 new candidate genes  
689 for autism spectrum disorder. *Nat. Neurosci.* **20**, 602–611 (2017).
- 690 14. Stessman, H. A. F. *et al.* Targeted sequencing identifies 91 neurodevelopmental-disorder  
691 risk genes with autism and developmental-disability biases. *Nat. Genet.* **49**, 515–526 (2017).
- 692 15. Zhang, Y. *et al.* Rapid single-step induction of functional neurons from human pluripotent  
693 stem cells. *Neuron* **78**, 785–798 (2013).
- 694 16. Paşca, A. M. *et al.* Functional cortical neurons and astrocytes from human pluripotent stem  
695 cells in 3D culture. *Nat. Methods* **12**, 671–678 (2015).
- 696 17. Dunaway, K. W. *et al.* Cumulative Impact of Polychlorinated Biphenyl and Large  
697 Chromosomal Duplications on DNA Methylation, Chromatin, and Expression of Autism  
698 Candidate Genes. *Cell Rep.* **17**, 3035–3048 (2016).
- 699 18. Adamo, A. *et al.* 7q11.23 dosage-dependent dysregulation in human pluripotent stem cells  
700 affects transcriptional programs in disease-relevant lineages. *Nat. Genet.* **47**, 132–141  
701 (2015).



- 702 19. Wilson, M. S., Graham, J. R. & Ball, A. J. Multiparametric High Content Analysis for  
703 assessment of neurotoxicity in differentiated neuronal cell lines and human embryonic stem  
704 cell-derived neurons. *Neurotoxicology* **42**, 33–48 (2014).
- 705 20. Williams, G. R. Neurodevelopmental and neurophysiological actions of thyroid hormone. *J.*  
706 *Neuroendocrinol.* **20**, 784–794 (2008).
- 707 21. Mullur, R., Liu, Y.-Y. & Brent, G. A. Thyroid hormone regulation of metabolism. *Physiol.*  
708 *Rev.* **94**, 355–382 (2014).
- 709 22. Morgenstern, R. *et al.* Phthalates and thyroid function in preschool age children: Sex  
710 specific associations. *Environ. Int.* **106**, 11–18 (2017).
- 711 23. Lignell, S. *et al.* Maternal body burdens of PCDD/Fs and PBDEs are associated with  
712 maternal serum levels of thyroid hormones in early pregnancy: a cross-sectional study.  
713 *Environ. Health* **15**, 55 (2016).
- 714 24. Fini, J.-B. *et al.* Human amniotic fluid contaminants alter thyroid hormone signalling and  
715 early brain development in *Xenopus* embryos. *Sci. Rep.* **7**, 43786 (2017).
- 716 25. Boas, M., Feldt-Rasmussen, U. & Main, K. M. Thyroid effects of endocrine disrupting  
717 chemicals. *Mol. Cell. Endocrinol.* **355**, 240–248 (2012).
- 718 26. Fini, J.-B. *et al.* An in vivo multiwell-based fluorescent screen for monitoring vertebrate  
719 thyroid hormone disruption. *Environ. Sci. Technol.* **41**, 5908–5914 (2007).
- 720 27. Fini, J. B. *et al.* Thyroid hormone signaling in the *Xenopus laevis* embryo is functional and  
721 susceptible to endocrine disruption. *Endocrinology* **153**, 5068–5081 (2012).
- 722 28. Korevaar, T. I. M. *et al.* Association of maternal thyroid function during early pregnancy  
723 with offspring IQ and brain morphology in childhood: a population-based prospective  
724 cohort study. *Lancet Diabetes Endocrinol* **4**, 35–43 (2016).

- 725 29. Oswald, F. *et al.* A phospho-dependent mechanism involving NCoR and KMT2D controls a  
726 permissive chromatin state at Notch target genes. *Nucleic Acids Res.* **44**, 4703–4720 (2016).
- 727 30. Xue, Y. *et al.* NURD, a novel complex with both ATP-dependent chromatin-remodeling and  
728 histone deacetylase activities. *Mol. Cell* **2**, 851–861 (1998).
- 729 31. Padilla, S., Hunter, D. L., Padnos, B., Frady, S. & MacPhail, R. C. Assessing locomotor  
730 activity in larval zebrafish: Influence of extrinsic and intrinsic variables. *Neurotoxicol.*  
731 *Teratol.* **33**, 624–630 (2011).
- 732 32. Préau, L., Fini, J. B., Morvan-Dubois, G. & Demeneix, B. Thyroid hormone signaling  
733 during early neurogenesis and its significance as a vulnerable window for endocrine  
734 disruption. *Biochim. Biophys. Acta* **1849**, 112–121 (2015).
- 735 33. Cartharius, K. *et al.* MatInspector and beyond: promoter analysis based on transcription  
736 factor binding sites. *Bioinformatics* **21**, 2933–2942 (2005).
- 737 34. Frisch, M., Klocke, B., Haltmeier, M. & Frech, K. LitInspector: literature and signal  
738 transduction pathway mining in PubMed abstracts. *Nucleic Acids Res.* **37**, W135–40 (2009).
- 739 35. Sadow, P. M. *et al.* Thyroid hormone receptor-specific interactions with steroid receptor  
740 coactivator-1 in the pituitary. *Mol. Endocrinol.* **17**, 882–894 (2003).
- 741 36. Méndez-Pertuz, M., Sánchez-Pacheco, A. & Aranda, A. The thyroid hormone receptor  
742 antagonizes CREB-mediated transcription. *EMBO J.* **22**, 3102–3112 (2003).
- 743 37. Zhang, J. & Lazar, M. A. The mechanism of action of thyroid hormones. *Annu. Rev.*  
744 *Physiol.* **62**, 439–466 (2000).
- 745 38. Boas, M. *et al.* Childhood exposure to phthalates: associations with thyroid function,  
746 insulin-like growth factor I, and growth. *Environ. Health Perspect.* **118**, 1458–1464 (2010).
- 747 39. Forhead, A. J. & Fowden, A. L. Thyroid hormones in fetal growth and parturition

- 748 maturation. *J. Endocrinol.* **221**, R87–R103 (2014).
- 749 40. Robson, H., Siebler, T., Shalet, S. M. & Williams, G. R. Interactions between GH, IGF-I,  
750 glucocorticoids, and thyroid hormones during skeletal growth. *Pediatr. Res.* **52**, 137–147  
751 (2002).
- 752 41. Bhat, M. K. *et al.* Tumor suppressor p53 is a negative regulator in thyroid hormone receptor  
753 signaling pathways. *J. Biol. Chem.* **272**, 28989–28993 (1997).
- 754 42. Yu, A., Fan, H. Y., Liao, D., Bailey, A. D. & Weiner, A. M. Activation of p53 or loss of the  
755 Cockayne syndrome group B repair protein causes metaphase fragility of human U1, U2,  
756 and 5S genes. *Mol. Cell* **5**, 801–810 (2000).
- 757 43. Laugel, V. *et al.* Mutation update for the CSB/ERCC6 and CSA/ERCC8 genes involved in  
758 Cockayne syndrome. *Hum. Mutat.* **31**, 113–126 (2010).
- 759 44. Northrop, J. P. *et al.* Selection of estrogen receptor beta- and thyroid hormone receptor beta-  
760 specific coactivator-mimetic peptides using recombinant peptide libraries. *Mol. Endocrinol.*  
761 **14**, 605–622 (2000).
- 762 45. Labrecque, L. *et al.* Src-mediated tyrosine phosphorylation of caveolin-1 induces its  
763 association with membrane type 1 matrix metalloproteinase. *J. Biol. Chem.* **279**, 52132–  
764 52140 (2004).
- 765 46. Cao, H., Alston, L., Ruschman, J. & Hegele, R. A. Heterozygous CAV1 frameshift  
766 mutations (MIM 601047) in patients with atypical partial lipodystrophy and  
767 hypertriglyceridemia. *Lipids Health Dis.* **7**, 3 (2008).
- 768 47. Qiao, F. *et al.* Krüppel-like factor 9 was down-regulated in esophageal squamous cell  
769 carcinoma and negatively regulated beta-catenin/TCF signaling. *Mol. Carcinog.* **55**, 280–  
770 291 (2016).

- 771 48. Gloyn, A. L., Braun, M. & Rorsman, P. Type 2 diabetes susceptibility gene TCF7L2 and its  
772 role in beta-cell function. *Diabetes* **58**, 800–802 (2009).
- 773 49. Califf, R. M. *et al.* Transforming Evidence Generation to Support Health and Health Care  
774 Decisions. *N. Engl. J. Med.* **375**, 2395–2400 (2016).

775

776 **Supplementary Information** is linked to the online version of the paper

777

### 778 **Acknowledgments**

779 The authors wish to dedicate this work to the memory of Prof. Bo A.G. Jönsson (1960 -  
780 2016), whose dedication and knowledge was instrumental to this project. This work  
781 received funding from the European Union's Horizon 2020 research and innovation  
782 programme under grant agreement No 634880, EDC-MixRisk (AB, JR, CGB, EN, BJ,  
783 CR, MJ, JBF, ML, BD, WK, JS, LB, EK, HK, GT), the European Research Council  
784 (ERC) (DISEASEAVATARS 616441 to GT); the EPIGEN Flagship Project of the Italian  
785 National Research Council (CNR)(GT); the ERANET-Neuron grant from the Italian  
786 Ministry of Health (AUTSYN)(PLG); the Umberto Veronesi Foundation (PLG); the Italian  
787 Ministry of Health (Ricerca Corrente Grant to GT); the Telethon Foundation (Grant  
788 GGP13231B to GT); Science Without Borders Program (CAPES, Brazil) (RBB); the  
789 Swedish Research Council Formas (GB, JR); Centre National de la Recherche  
790 Scientifique (CNRS) (JBF, BD), Muséum National d'Histoire Naturelle (MNHN)(BD,  
791 CNRS).

### 792 **Author Contributions**

793 C.G.B is principal investigator for the SELMA study and responsible for the biostatistical  
794 modelling together with C.G. N.C. carried out all the experiments with human  
795 neurodevelopmental systems, including neuronal differentiation, EDC exposure, RNA-  
796 Seq libraries; P.-L.G designed the analytical strategy of transcriptomic data; G.D.  
797 designed and edited the figures; G.D and M.Z. generated Ngn2 monoclonal lines; N.C.  
798 and G.B. carried out exposure experiments with iPSC-MSC and adult MSC and  
799 performed RNA-seq; G.B. set up and performed adipocyte differentiation, lipid droplet  
800 assessment and RT-qPCR in adult MSC; V.M.K. established the imaging platform for  
801 lipid droplet accumulation quantification; F.R. planned, carried out and analysed the  
802 experiments with the SH-SY5Y neuroblast model including EDC exposure, analyses of  
803 morphology and gene expression; B.S. contributed to the planning and data analyses  
804 for the SH-SY5Y neuroblast model. E.N. planned, supervised the work and analysed the  
805 data in the SH-SY5Y model. P.-L.G and N.C. performed RNA-Seq bioinformatic analysis  
806 on both neurodevelopmental and mesenchymal systems; A.L.T., S.T. and N.C. set up  
807 the cortical organoids protocol; A.L.T. performed immunofluorescence of Ngn2-driven  
808 neuronal precursors and cortical organoids; R.B.B. and S.P. provided human foetal  
809 primary stem cells and performed immunofluorescence for them; F.C. and M.La. set up  
810 astrocyte-free Ngn2 differentiation protocol; L.B. carried out all the experiments with  
811 *Danio rerio*, including EDC exposure, RT-qPCR and mobility assay; L.B and J.S  
812 analysed the *Danio rerio* data; M.Le. carried out all the experiments with *Xenopus*  
813 *laevis*, including EDC exposure, XETA, RT-qPCR and mobility assay; B.D, J.B.F, M.Le.  
814 analysed the *Xenopus* data; M.Le. made the genomatix figure; N.E.C. and G.T.  
815 attended to the bioethical issues of the project; A.B., P.D., M.J., W.K, E.K., J.B.F, H.K.,

816 M.O., P.R., C.R. and O.S. contributed to the study design, discussions and critical  
817 reading of the manuscript; G.B., C.G.B., N.C., B.D., P.L.G., M.Le., L.B., C.J., J.R. and  
818 G.T. wrote the paper; C.G.B., B.D., J.B.F., C.G., E.N., J.R., J.S. and G.T. conceived,  
819 designed and supervised the study.

820

## 821 **Author Information**

822 The authors declare no competing financial interests.

823

824 The datasets generated during and/or analysed during the current study will be available  
825 in the GEO repository.

826

827 Correspondence and requests for materials should be addressed to  
828 [joelle.ruegg@swetox.se](mailto:joelle.ruegg@swetox.se), [giuseppe.testa@ieo.it](mailto:giuseppe.testa@ieo.it), [carl-gustaf.bornehag@kau.se](mailto:carl-gustaf.bornehag@kau.se), or  
829 [barbara.demeneix@mnhn.fr](mailto:barbara.demeneix@mnhn.fr)

830

831

832

## 833 **Tables**

834

835 **Table 1a: Description of the study population including 1,874 pregnant women and their**  
 836 **children in the SELMA study**

| Pregnant women                                                         |                | Children                                                      |             |
|------------------------------------------------------------------------|----------------|---------------------------------------------------------------|-------------|
| <b>Age at enrollment (year); mean (SD)<sup>1,2</sup></b>               | 31.0<br>(4.8)  | <b>Gestational age at birth (week); mean (SD)<sup>1</sup></b> | 39.3 (1.8)  |
| <b>Weight at enrollment (kg); mean (SD)<sup>1,2</sup></b>              | 69.6<br>(13.6) | <b>Birth length (cm); mean (SD)</b>                           | 51.2 (2.6)  |
| <b>Gestational age for biosampling (week); mean (SD)</b>               | 9.9 (2.1)      | <b>Sex (girls)<sup>1,2</sup></b>                              | 47.2%       |
| <b>Smoking during pregnancy (yes)<sup>1,2</sup></b>                    | 4.7%           | <b>APGAR score (&lt;10)</b>                                   | 12.7%       |
| <b>Parity (null parity)<sup>1,2</sup></b>                              | 44.8%          | <b>Birth weight (g); mean (SD)<sup>3</sup></b>                | 3.619 (584) |
| <b>Education (university or higher)<sup>1,2</sup></b>                  | 61.4%          | <b>Language delay (&lt;50 words)<sup>4</sup></b>              | 10.0%       |
| <b>Fish consumption in the family (score); mean (SD)<sup>1,2</sup></b> | 4.2 (2.1)      |                                                               |             |
| <b>Urinary creatinine, (mmol/L); mean (SD)<sup>1,2</sup></b>           | 10.5<br>(4.8)  |                                                               |             |

- 837 1) Co-variates for analyzing birth weight to establish MIX G  
 838 2) Co-variates for analyzing language delay to establish MIX N  
 839 3) Outcome variable for MIX G  
 840 4) Outcome variable for MIX N  
 841

842

843 **Table 1b: Distribution of phthalate and phenol metabolites in urine and perfluorinated**  
 844 **compounds (PFAS) in serum analysed in 1<sup>st</sup> trimester of 1,874 pregnant women in the**  
 845 **SELMA study**

| Compound  | Metabolite                                          | Phthalate and phenol metabolites in urine<br>(ng/mL) |                  |                  |
|-----------|-----------------------------------------------------|------------------------------------------------------|------------------|------------------|
|           |                                                     | Median                                               | 95%              | GM (95% CI)      |
| DEP       | MEP                                                 | 62.6                                                 | 507.7            | 68.7 (65.3-72.3) |
| DBP       | MBP                                                 | 71.9                                                 | 233.1            | 69.0 (66.5-71.5) |
| BBzP      | MBzP                                                | 16.8                                                 | 99.4             | 16.6 (15.8-17.4) |
| DEHP      | MEHP                                                | 3.8                                                  | 15.6             | 3.8 (3.6-3.9)    |
|           | MEHHP                                               | 16.6                                                 | 66.6             | 16.3 (15.7-17.0) |
|           | MEOHP                                               | 11.2                                                 | 45.0             | 11.1 (10.7-11.6) |
|           | MECPP                                               | 15.7                                                 | 62.7             | 15.8 (15.2-16.4) |
| DiNP      | MHiNP                                               | 5.9                                                  | 54.6             | 6.2 (5.9-6.6)    |
|           | MOiNP                                               | 2.7                                                  | 19.2             | 2.9 (2.8-3.0)    |
|           | MCiOP                                               | 8.7                                                  | 74.9             | 9.8 (9.3-10.2)   |
| BPA       |                                                     | 1.5                                                  | 6.2              | 1.5 (1.4-1.6)    |
| Triclosan |                                                     | 0.8                                                  | 351.4            | 1.3 (1.2-1.5)    |
| Compound  | Perfluorinated compounds (PFAS) in serum<br>(ng/mL) |                                                      |                  |                  |
|           | Median                                              | 95%                                                  | GM (95% CI)      |                  |
| PFOA      | 1.60                                                | 3.96                                                 | 1.60 (1.56-1.64) |                  |
| PFOS      | 5.35                                                | 12.29                                                | 5.30 (5.18-5.43) |                  |
| PFNA      | 0.53                                                | 1.29                                                 | 0.54 (0.53-0.55) |                  |
| PFDA      | 0.25                                                | 0.59                                                 | 0.26 (0.25-0.27) |                  |
| PFUnDA    | 0.23                                                | 0.54                                                 | 0.21 (0.21-0.22) |                  |
| PFDoDA    | 0.03                                                | 0.08                                                 | 0.03 (0.03-0.03) |                  |
| PFHxS     | 1.23                                                | 3.71                                                 | 1.32 (1.29-1.36) |                  |
| PFHpA     | 0.02                                                | 0.09                                                 | 0.02 (0.02-0.02) |                  |

846

847

848



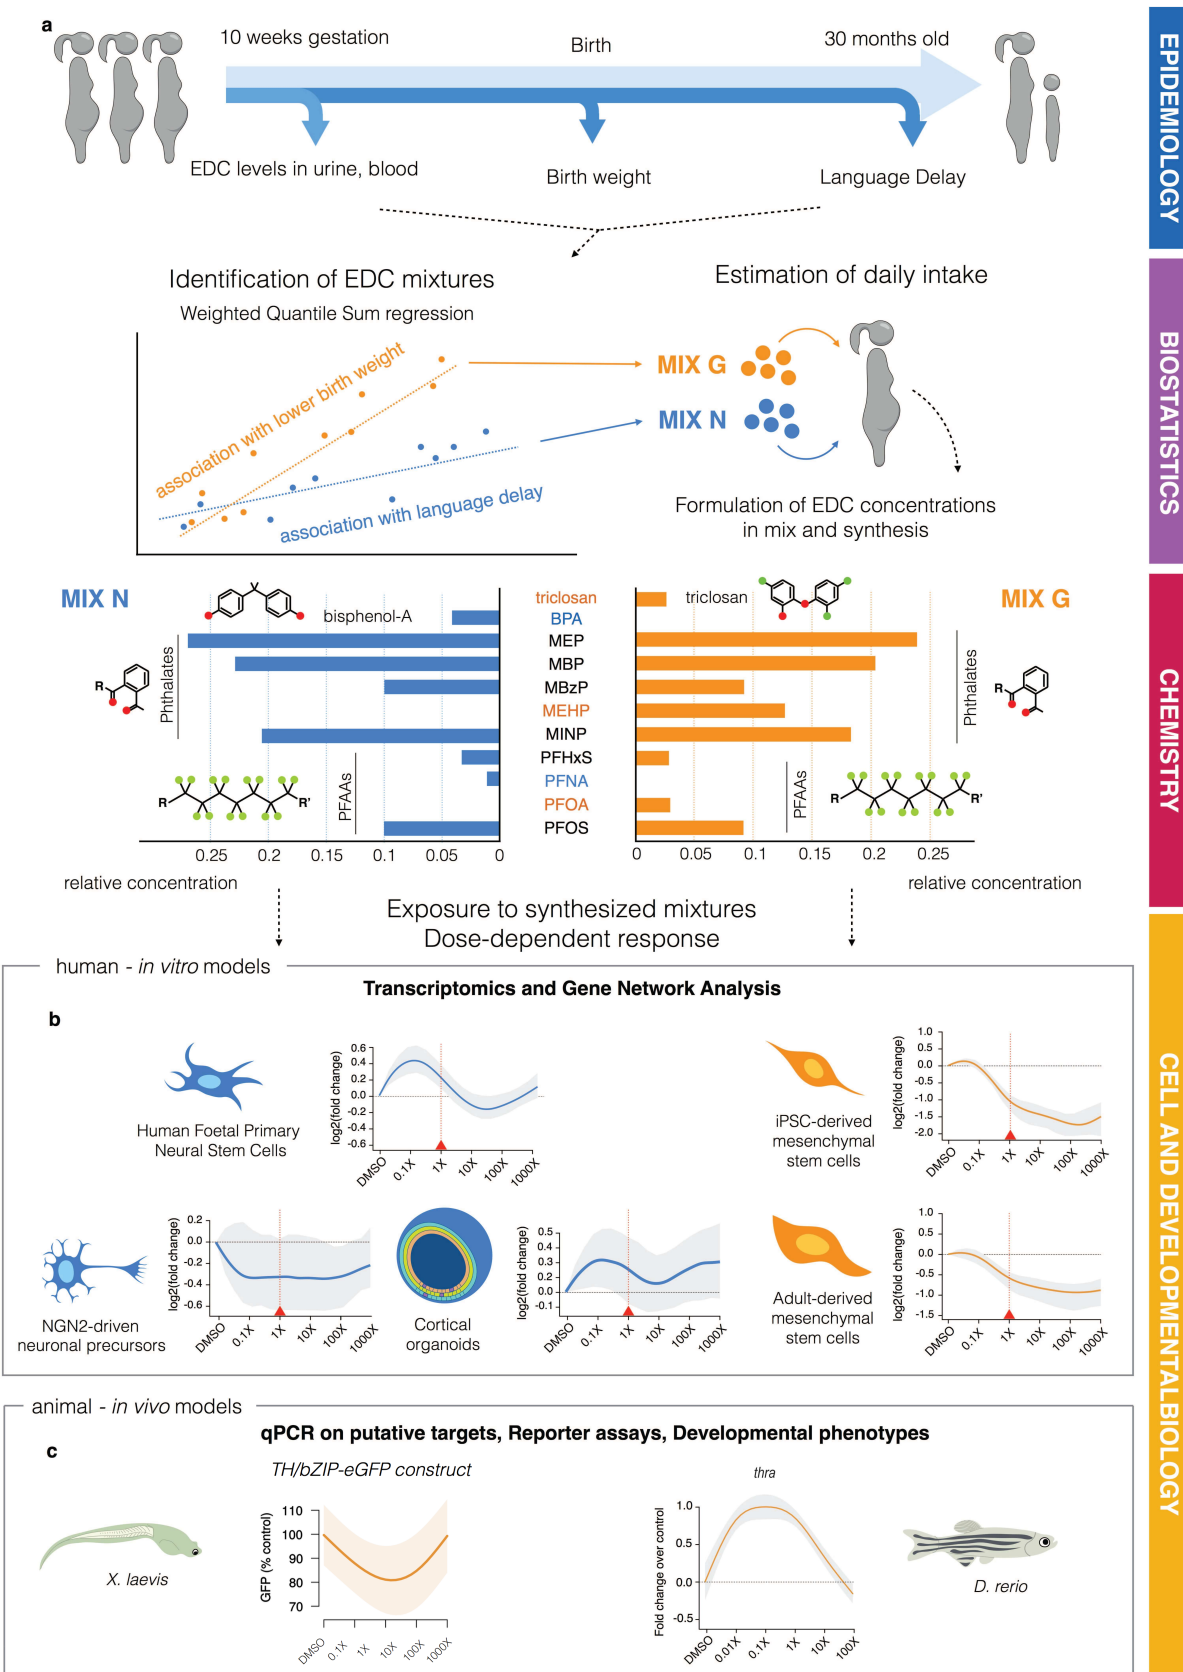

850 **Figure 1: Overview of the study**  
851 **a: Identification of two EDC mixtures that are associated with adverse health outcomes in two**  
852 **health domains, neurodevelopment and growth.** In the SELMA pregnancy study, 20 EDCs and  
853 metabolites were measured in urine or serum of women around pregnancy week 10. Associations  
854 between these exposures and language delay of the children at age 2.5 years or birth weight were  
855 established using weighted quantile sum regression. This resulted in the identification of so-called “bad  
856 actors” that contributed to the association with the adverse health outcome (language delay or reduced  
857 birth weight) in the mixture. Based on their ratios found in the SELMA women’s serum, the identified bad  
858 actors were mixed to compose MIX N (based on the association with language delay, blue coloured) and  
859 MIX G (based on the association with birth weight, orange coloured) for subsequent use in the  
860 experimental systems in concentrations corresponding to 0.01X, 0.1X, 1X, 10X, 100X, and 1000X serum  
861 concentrations in the SELMA mothers. **b: Identification of gene regulatory networks and cellular**  
862 **responses dysregulated by MIX N and MIX G, along with their dose-response relationships.**  
863 Transcriptome analyses were carried out in Human Foetal Primary Neural Stem Cells (HFPNSC), NGN2-  
864 driven neural precursors, or cortical organoids as well as in iPSC-derived or adult mesenchymal stem  
865 cells (MSCs) upon 48 h treatment with 0.1-1000X MIX N and MIX G, respectively. Predominant dose-  
866 response patterns showed, in most models, non-monotonic shapes. Significant transcriptional changes  
867 were detected already at 1X concentrations. **c: Validation of key pathways affected by MIX N and MIX**  
868 **G and their physiological impact in paradigmatic *in vivo* models.** Effects on key genes and pathways  
869 identified in the cellular models were assessed in *Xenopus laevis* and *Danio rerio* larvae upon short-term  
870 treatment (48-72 h), exemplified by GFP levels in transgenic *Xenopus* bearing a thyroid hormone-induced  
871 GFP reporter (left panel) and thyroid hormone receptor alpha (*thra*) expression quantified using RT-qPCR  
872 in zebrafish (right panel) upon MIX G exposure.  
873  
874

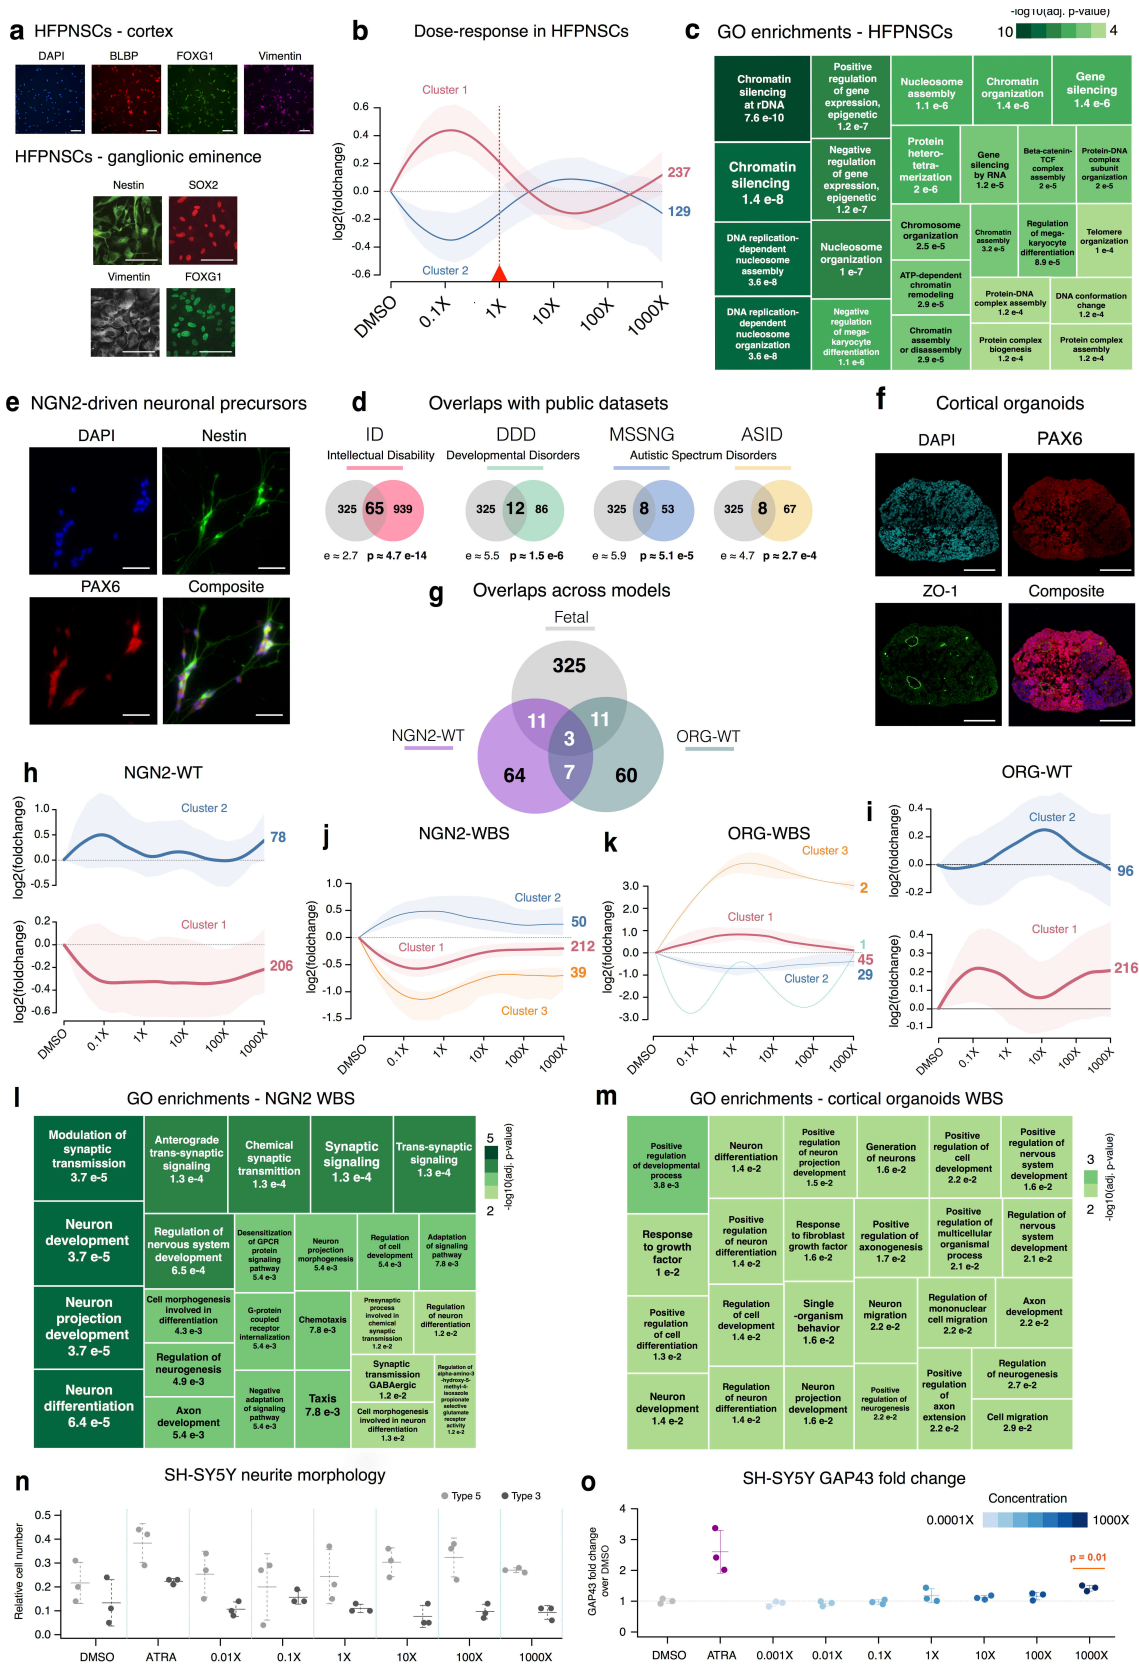

876 **Figure 2: MIX N disrupts neurodevelopmental pathways in human cellular models**  
877 **a:** Immunofluorescence of paradigmatic neural stem cell markers are shown for cortical (scale bar=10 $\mu$ m)  
878 and ganglionic eminence (scale bar=20 $\mu$ m) derived human foetal primary neural stem cells (HFPNSC). **b:**  
879 Unbiased DEGs were identified through categorical analysis and were clustered into major dose-  
880 responses patterns, plotted across the different MIX N dilutions used for exposure. **c:** Treemap of the  
881 enriched gene ontology terms for the unbiased DEGs of HFPNSC (the size and color of the boxes is  
882 proportional to the significance of the enrichment). **d:** Overlaps, enrichment and significance between  
883 unbiased HFPNSC DEGs and genes associated to intellectual disability, developmental disorders and  
884 autism spectrum disorders in published databases. **e:** Immunofluorescence of paradigmatic neuronal  
885 markers are shown for NGN2-driven neural precursors (scale bar=20 $\mu$ m). **f:** Immunofluorescence of  
886 paradigmatic neuronal markers are shown for cortical organoids (scale bar=200 $\mu$ m). **g:** Overlaps between  
887 unbiased DEGs of HFPNSC and unbiased DEGs of the WT cell line differentiated into NGN2-driven  
888 neural precursors and cortical organoids. **h:** Unbiased DEGs, previously identified for HFPNSC, plotted in  
889 the WT cell line differentiated into NGN2-driven neural precursors across the different MIX N dilutions. **i:**  
890 Unbiased DEGs, previously identified for HFPNSC, plotted in the WT cell line differentiated into cortical  
891 organoid across the different MIX N dilutions. **j:** Unbiased DEGs identified through categorical analysis in  
892 the 2 WBS cell lines, differentiated into NGN2-driven neural precursors, clustered into major dose-  
893 responses patterns and plotted across the different MIX N dilutions used for exposure. **k:** For the 2 WBS  
894 cell lines, differentiated into cortical organoids, unbiased DEGs were identified through categorical  
895 analysis, clustered into major dose-responses patterns and plotted across the different MIX N dilutions  
896 used for exposure. **l:** treemap of the enriched Gene Ontology (GO) categories for the unbiased DEGs of  
897 WBS NGN2-driven neural precursors is shown. **m:** Treemap of the enriched gene ontology categories for  
898 the unbiased DEGs of WBS cortical organoids is shown. **n:** Relative number of cells with immature  
899 neurites (Type 3) or maturing neurites with nodes (Type 5) in SH-SY5Y cells treated with MIX N for 96  
900 hours. Also shown are vehicle (0.01 % DMSO) and positive control (ATRA). Data are shown as mean  $\pm$   
901 SD of the relative amount of type 5 and 3 cells with three experimental replicates. Testing for dose-  
902 response was significant ( $p=0.017$ ) in a one way ANOVA with a cubic fit on the ratio of type 5 and 3 cells.  
903 **o:** Effect of MIX N on *GAP43* mRNA expression in SH-SY5Y cells. Treatment with 10  $\mu$ M ATRA was  
904 included as a positive control. Data were quantified by the relative standard curve method and expressed  
905 as the relative amount of *GAP43* divided by the relative amount of *GAPDH*. Data are shown as mean  $\pm$   
906 SD of 3 experimental replicates. Testing for dose-response was significant ( $p=0.001$ ) in a one way  
907 ANOVA. The p-value in the figure is from a TUKEY HSD post hoc test on the relative amount of *GAP43*  
908 divided by the relative amount of *GAPDH* compared to vehicle (DMSO).  
909 For dose-response plots, the size of the line is proportional to the number of genes in the cluster, and  
910 shading represents 80% of the log<sub>2</sub>-fold change variation across genes.  
911  
912  
913

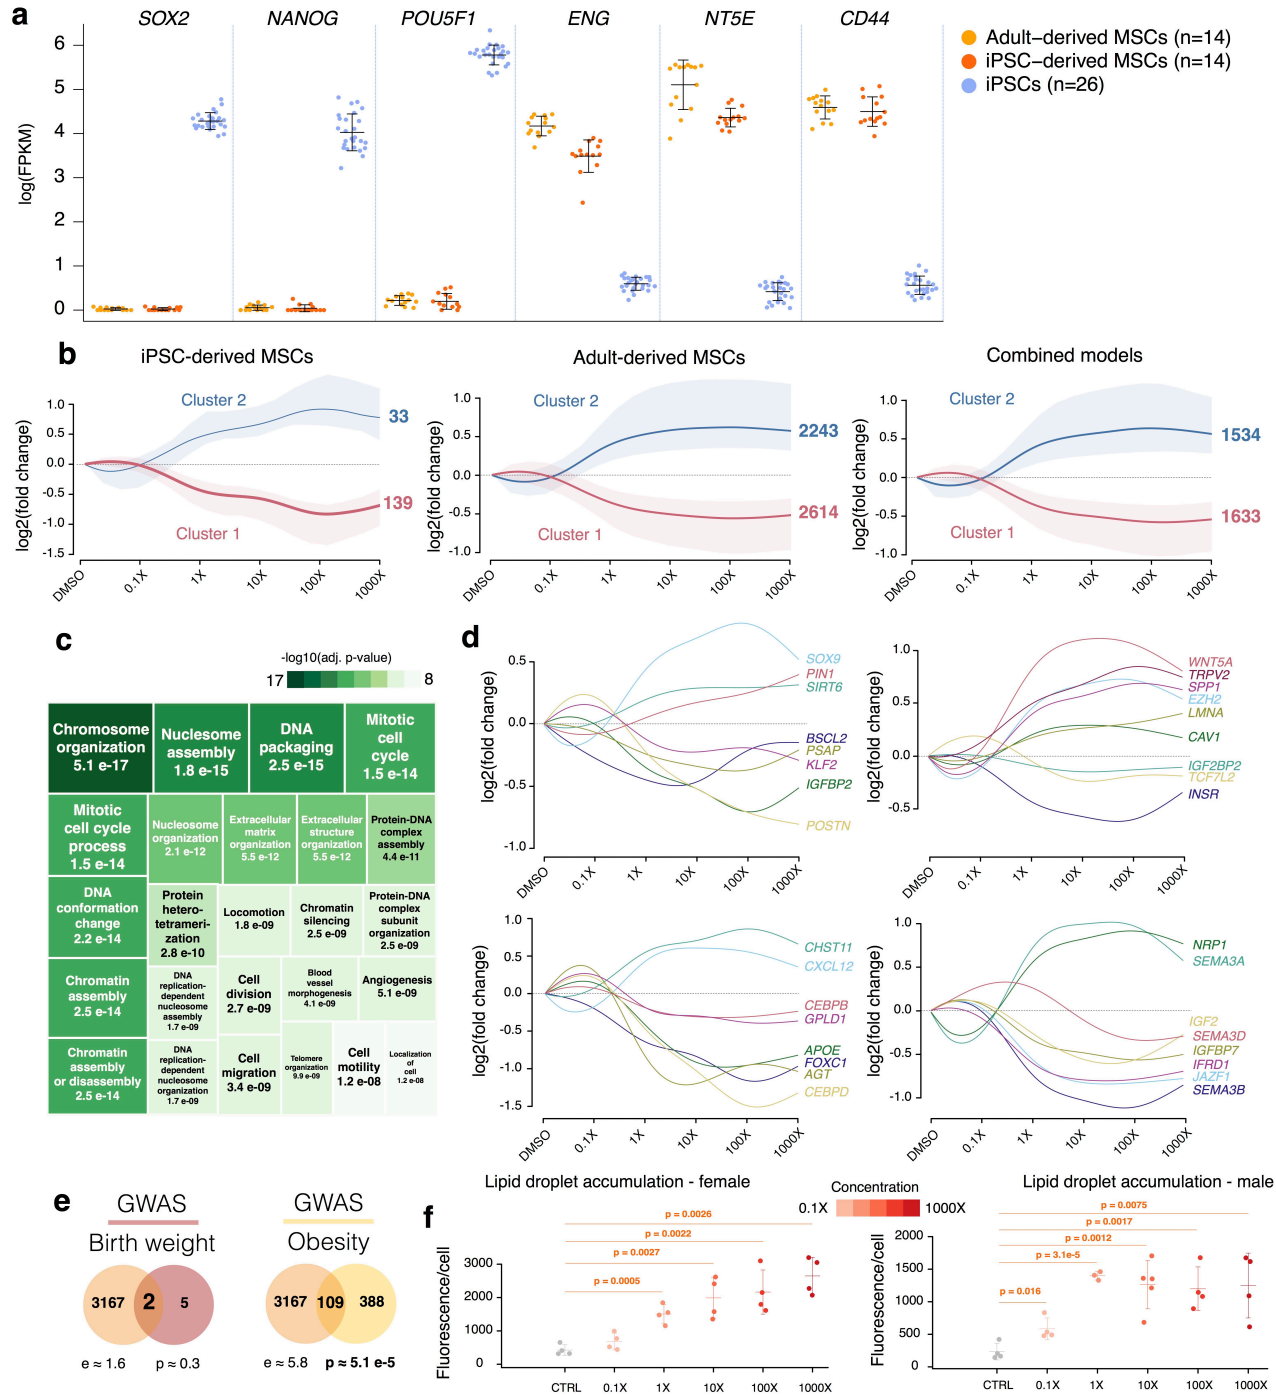

914  
915  
916  
917  
918  
919  
920  
921  
922  
923

**Figure 3: MIX G disrupts metabolic pathways in human MSCs**

**a:** Log-transformed Fragments Per Kilobase of transcript per Million mapped reads (FPKM) of specific pluripotency and mesenchymal markers in MSC experimental systems and iPSC. **b:** Unbiased DEGs identified through categorical analysis for adult MSCs, iPSC-derived MSCs or both systems combined, clustered into major dose-responses patterns and plotted across the different MIX G dilutions (the size of the line is proportional to the number of DEGs in the cluster, shades represent 80% variance across samples). **c:** Treemap of the enriched Gene Ontology (GO) terms in the DEGs from the merged analysis of the two MSC systems. **d:** Dose-response patterns of DEGs that associated to adipogenesis and

924 osteogenesis. **e**: Overlaps, enrichment and significance between unbiased mesenchymal DEGs and  
925 genes associated to alteration of birth weight and obesity. **f**: Quantification of lipid droplet accumulation in  
926 adult MSCs by Bodipy 493/503 staining upon treatment with the indicated concentrations of MIX G for 3  
927 weeks. Values are normalised to nuclei count and representative of three independent experiments for  
928 each of the 2 donors, shown as mean and S.D. from 3 to 6 replicates of a single experiment.  
929

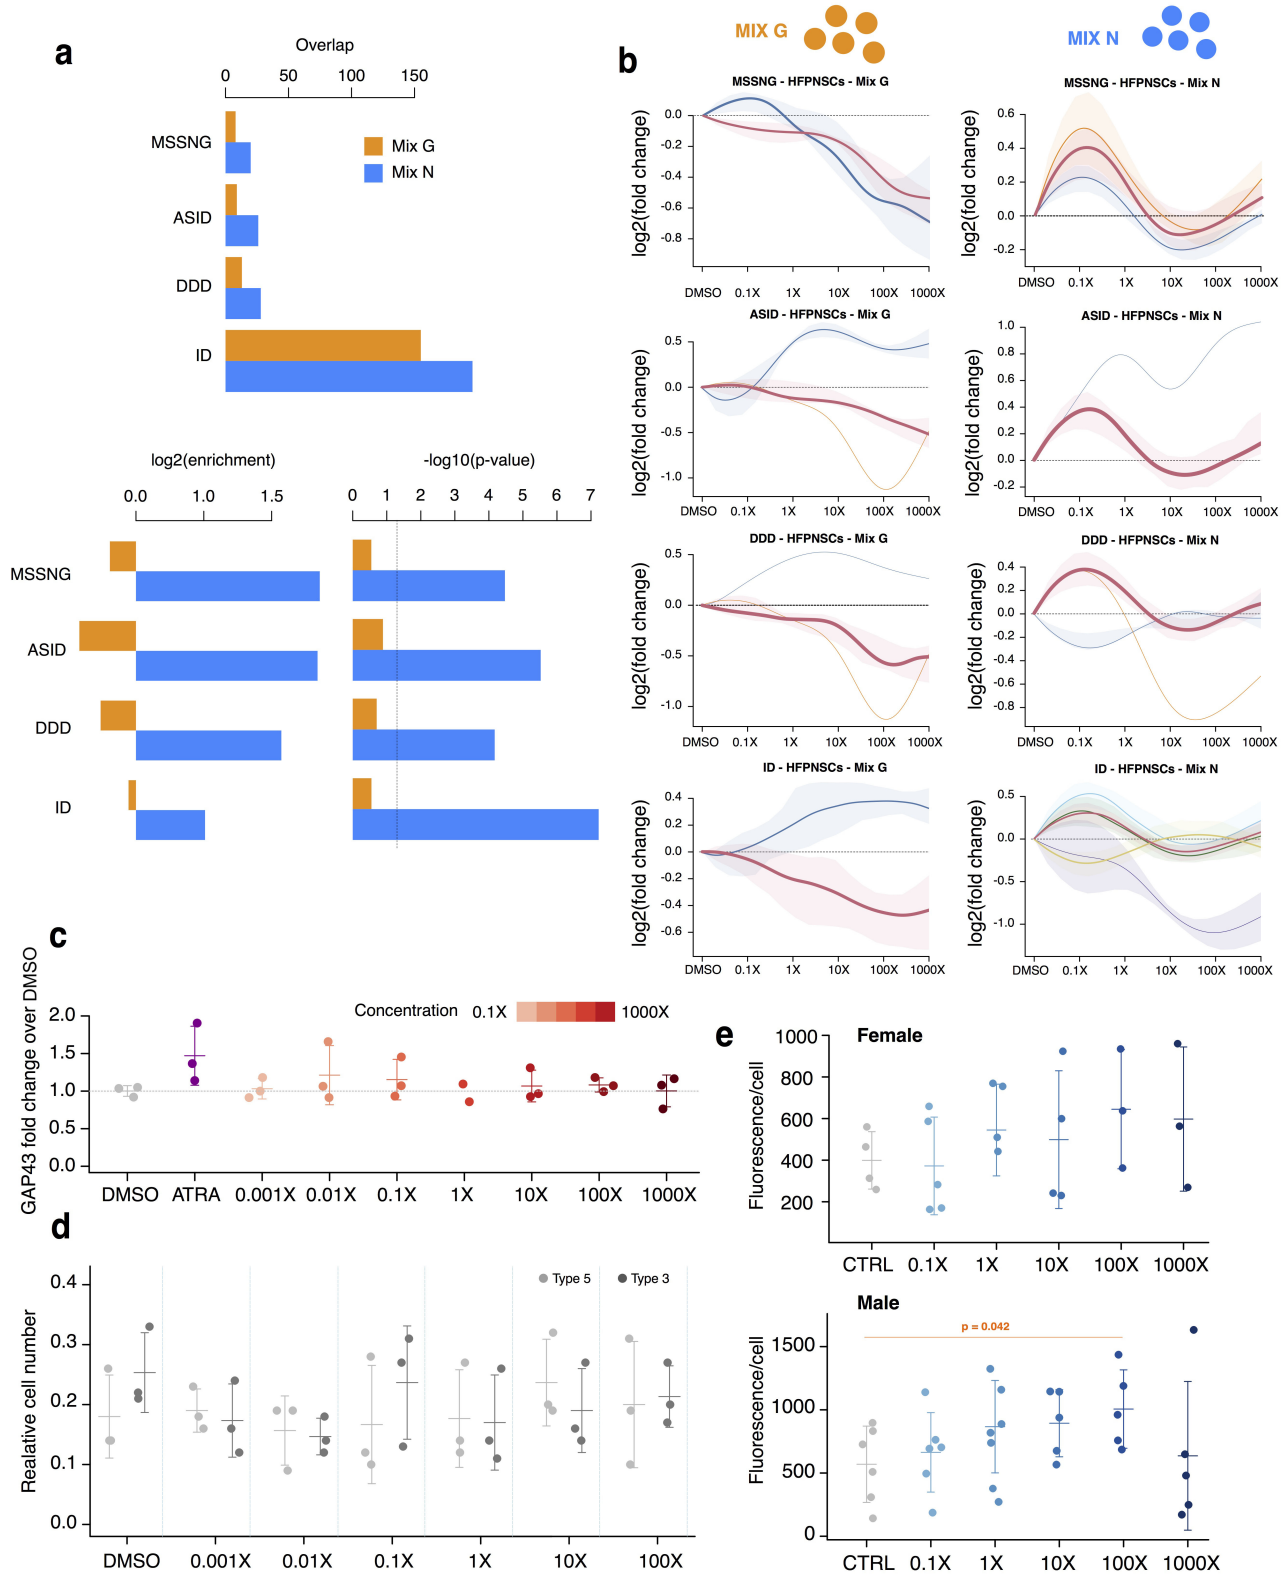

930  
931  
932  
933

934 **Figure 4: Differential impact of MIX N vs MIX G on human developmental systems**  
935 **a:** Overlaps, enrichment and significance between relevant gene sets and, respectively, MIX N- and MIX  
936 G-associated DEGs in HFPNSC. **b:** Comparison of the dose-response patterns, upon treatment with each  
937 mixture, for the union of DEGs, identified upon exposure to either of the two mixtures, that are associated  
938 to autism, intellectual disability or developmental disorders (the size of the line is proportional to the  
939 number of DEGs in the cluster, shades represent 75% variance across samples). **c:** Effect of MIX G on  
940 *GAP43* mRNA expression in SH-SY5Y cells. Treatment with 10  $\mu$ M ATRA was included as a positive  
941 control. Data were quantified by the relative standard curve method and expressed as the relative amount  
942 of *GAP43* divided by the relative amount of *GAPDH*. Data are shown as mean  $\pm$  SD of 3 experimental  
943 replicates (except 1X G for which n=2). **d:** Relative number of cells with immature neurites (Type 3) or  
944 maturing neurites with nodes (Type 5) in SH-SY5Y cells treated with MIX G or vehicle (0.01 % DMSO) for  
945 96 hours. Data are shown as mean  $\pm$  SD of the relative amount of type 5 and 3 cells with three  
946 experimental replicates.  
947 **e:** For adult MSCs, lipid droplet accumulation was quantified using Bodipy 493/503 staining upon  
948 treatment with the indicated concentrations of MIX N for 3 weeks. Values are normalised to nuclei count  
949 and representative of three independent experiments for each of the 2 donors, shown as mean  $\pm$  SD from  
950 3 to 6 replicates of a single experiment.  
951  
952



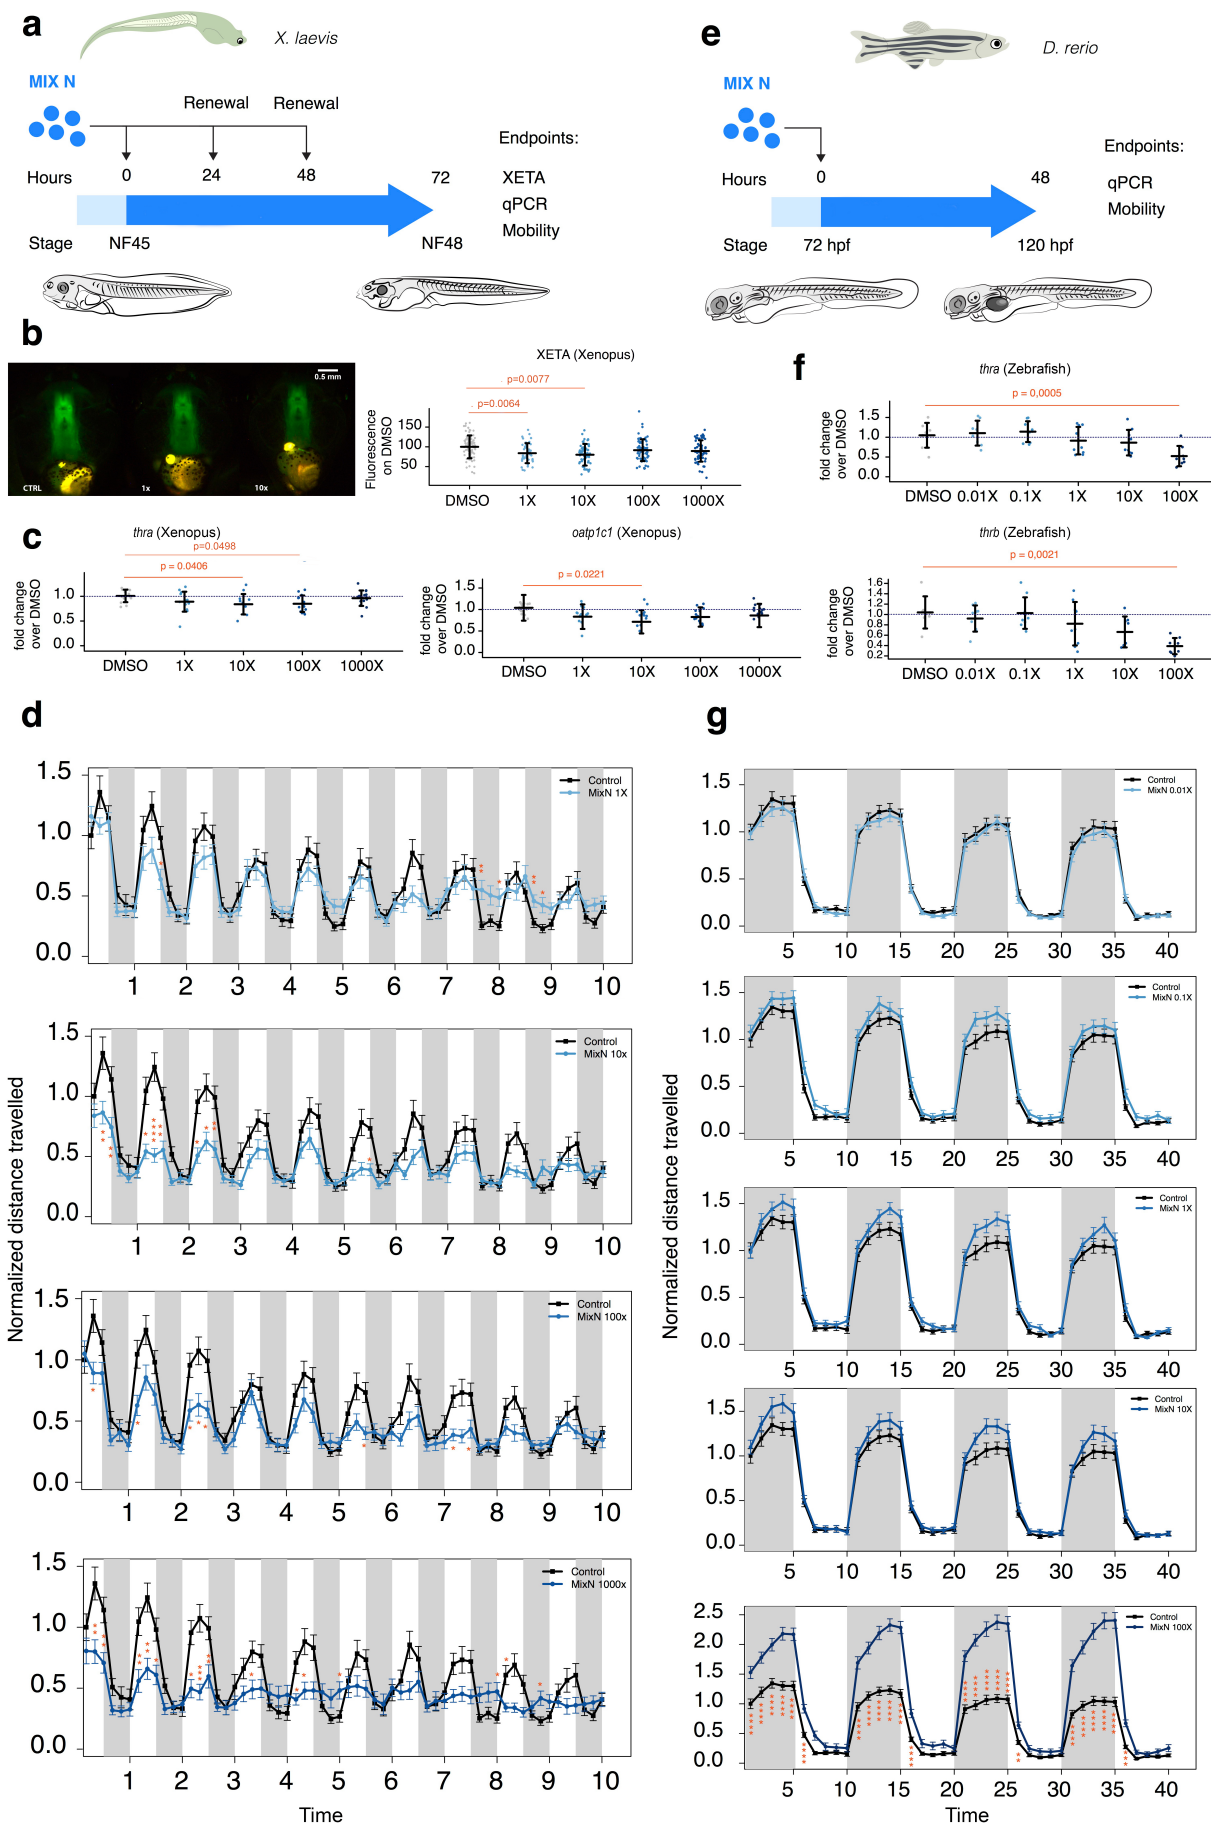

954  
955 **Figure 5: MIX N exposure disrupts thyroid hormone signaling and normal behavior both in**  
956 ***Xenopus laevis* and *Danio rerio***  
957 **a:** The experimental setup for *X. laevis*. **b:** Thyroid disrupting effects were assessed using Xenopus  
958 Thyroid Embryonic Assay (XETA). Representative images of CTRL, 1X and 10X exposed tadpoles are  
959 shown on the left. Specific fluorescence in tadpoles' head was quantified as relative fluorescence units  
960 normalized against CTRL (right). A pool of five independent experiments with >10 tadpoles per  
961 concentration per experiment is shown as mean  $\pm$  SD. A significant decrease is found at 1X and 10X  
962 concentration. **c:** RT-qPCR following brain dissection for TH early-response target genes (*thra* and  
963 *oatp1c1*) in wild type tadpoles exposed to protocol (a). Shown is a pool of three independent experiments  
964 with mean  $\pm$  SD (4 to 5 replicates per concentration per experiment). **d:** Mobility of exposed tadpoles was  
965 measured for 10 minutes in 30 sec light/30 sec dark cycles. Total distance travelled was analyzed over  
966 time. Shown is a pool of three independent experiments as mean  $\pm$  SEM with 7-12 tadpoles per  
967 concentration per experiment. **e:** The experimental setup for *Danio rerio*. **f:** *D. rerio* embryos were  
968 exposed (protocol (e)), and RT-qPCR was performed on pooled whole larvae for TH early-response target  
969 genes: *thra* and *thrb*. Shown is a pool of the three independent experiments with mean  $\pm$  SD (3 replicates  
970 per concentration per experiment). **g:** Mobility of exposed zebrafish embryos (120 hpf) was measured for  
971 40 minutes in 5 min dark/5 min light cycles. Distance travelled was analyzed over time. Shown is a pool of  
972 the three independent experiments as mean  $\pm$  SEM with 6 to 8 larvae per concentration per plate and 3  
973 plates per experiment. Significance for both mobility experiments: parametric One-way ANOVA or  
974 nonparametric Kruskal-Wallis test. \*P<0.05, \*\*P<0.01, \*\*\*P<0.001, \*\*\*\*P<0.0001.  
975  
976

## Key

DEGs *in vitro* involved in neurodevelopmental delay or ASD

DEGs *in vitro* involved in growth or metabolism

DEGs *in vivo* involved in TH signaling

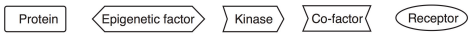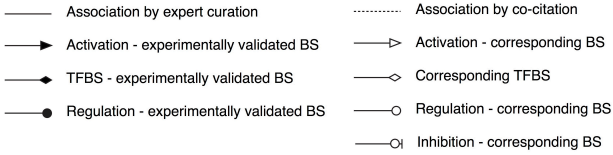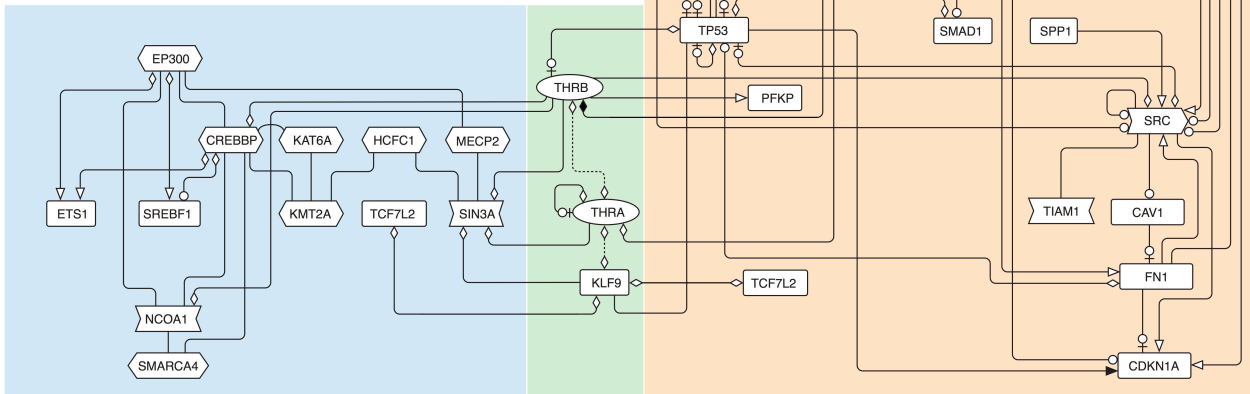

977  
978

### 979 **Figure 6: Thyroid hormone receptor (THRA and THRB)- and KLF9-linked pathways regulate** 980 **Differentially Expressed Genes (DEGs) identified in human models**

981 Regulatory pathways were generated by the Genomatix GEPS program that connects differentially  
982 expressed genes. Green box: starting from DEGs identified *in vivo* in *Xenopus* and *Danio rerio*,  
983 interactions were established with disease-linked DEGs identified in HFPNSC. Orange box: DEGs  
984 identified in adult MSC and iPSC-derived MSC human lines related to growth or metabolism. Blue box:  
985 DEGs identified in HFPNSC and implicated in neurodevelopment or ASD. TFBS stands for transcription  
986 factor binding site and BS for binding site.

987  
988
